# Supplementary material for: Effective CRISPR interference of an endogenous gene via a single transgene in mice
Source: PubMed Central journal article supplement (PMC6872636; doi:10.1038/s41598-019-53611-6), 2019-11-21
Supplement: 41598_2019_53611_MOESM1_ESM.pdf [file 41598_2019_53611_MOESM1_ESM.pdf]

Supplementary information for: Effective CRISPR interference of an endogenous gene via a single transgene in mice

Ryan S. MacLeod, Keisha M. Cawley, Igor Gubrij, Intawat Nookaew, Melda Onal, and Charles A. O'Brien

Line 157

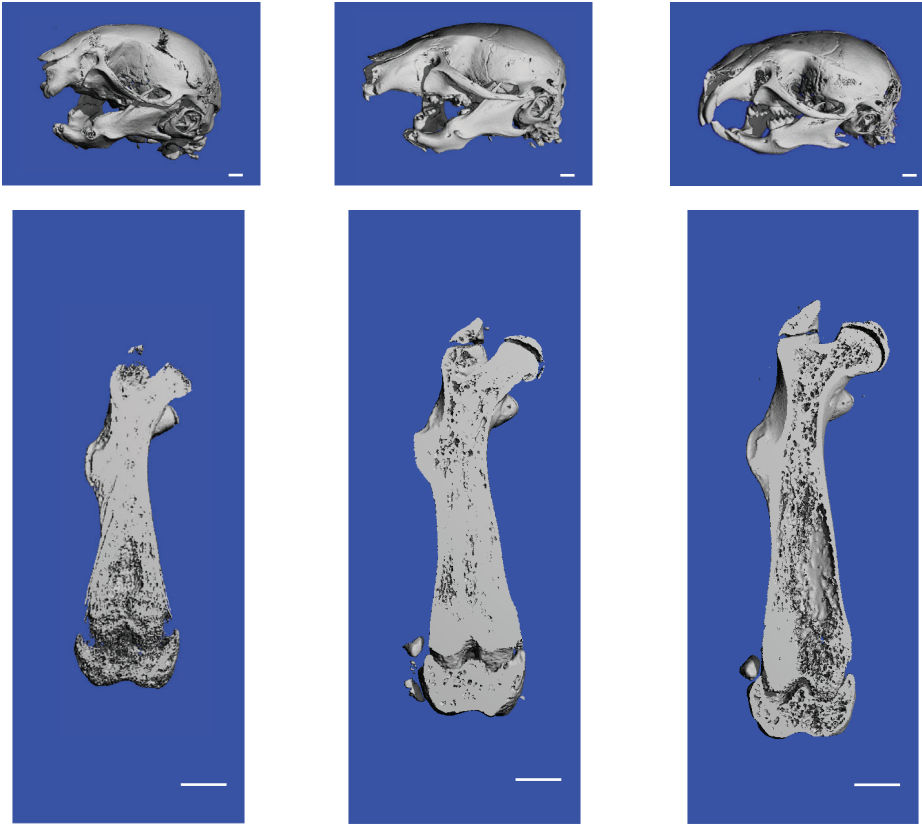

**Supplementary Figure S1. Animal-to-animal variance within lines of CRISPRi mice.** Micro-CT generated images of skulls and femurs of three different transgenic mice from line 157.

## Supplementary Figure S2. Diagram and annotated sequence of CRISPRi transgene.

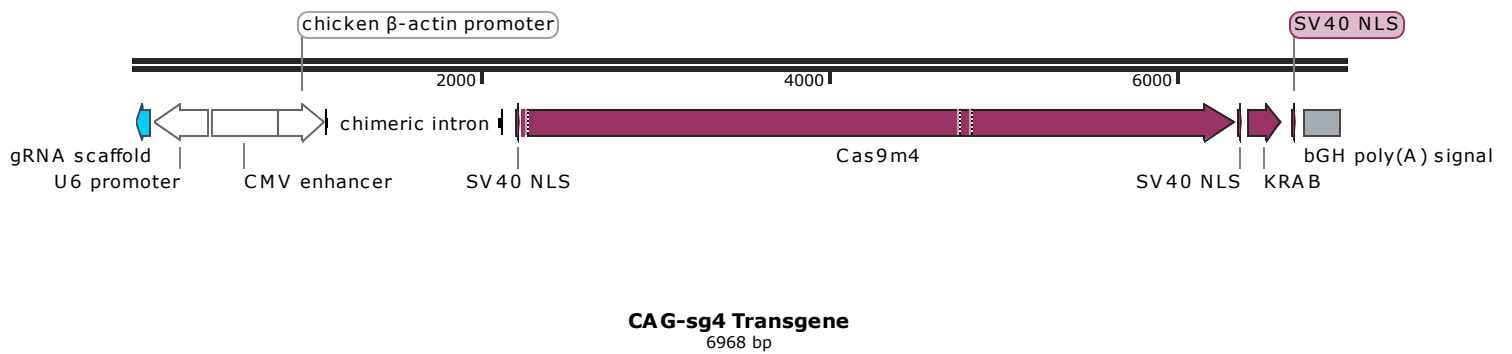





cccggagcgcggcggtgtcgagggcggcgagccgcagccattgacctttatggtaatcgtgagagggcgagggga  
 -----  
 gggcctcgcggccgacagctccgcgcccgtcggcgtcggtaacggaaaataccattagcacgctctcccgcgtccct  
 -----  
 chimeric intron

cttcctttgtcccaaatctgtgaggagccgaaatctgggaggcggcggcaccacctctagcggggcgggggcgaagcg  
 -----  
 gaaggaaacaggggttagacacgcctcggcttagaccctccgcggcggcgtgggggagatcgcccgcgcccgccttcgc  
 -----  
 chimeric intron

gtgaggcggcggcaggaaggaaatgggaggggagggccttcgtgctcggcggcggcgtccccttctccctctccagc  
 -----  
 cacgccgaggcgtccttctttaccgcccctcccgaagcacgcagcggcggcggcaggggaagagggagaggtcg  
 -----  
 chimeric intron

ctcggggctgtccgagggggacggctgccttcgggggggacggggcagggcggggttcggcttctggcgtgtgaccggc  
 -----  
 gagccccgacaggcggccccctgccgacggaagccccctgccccgtcccggcccaagccgaagaccgcacactggccg  
 -----  
 chimeric intron

ggctctagagcctctgctaaccatgttcatgccttcttcttttctacagctcctgggcaacgtgctggttattgtgct  
 -----  
 ccgagatctcggagacgattggtacaagtacggaagaagaaaaggatgtcgaggacccttgcacgaccaataacacga  
 -----  
 chimeric intron

gtctcatcattttggcaaagaattAAATacgctgtGTTccggtgccaccATGCCAAGAAGAAGAGGAAGGTGGGAAGGG  
 -----  
 cagagtagtaaaaccgtttcttaaTTTATgcgacaCAAGgccacggtggTACGGGTCTTCTTCTCCTTCCACCCCTCCC

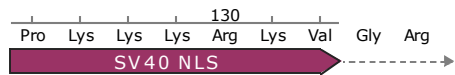

GGATGGACAAGAAGTACTCCATTGGGCTCGCTATCGGCACAAACAGCGTCGGCTGGGCCGTCATTACGGACGAGTACAAG  
 -----  
 CCTACCTGTTCTTCATGAGGTAACCCGAGCGATAGCCGTGTTTGTGCGAGCCGACCCGGCAGTAATGCCTGCTCATGTTC

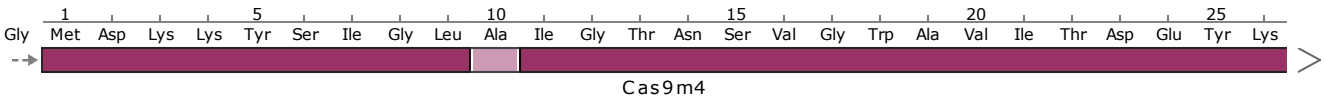

GTGCCGAGCAAAAAATTCAAAGTTCTGGGCAATACCGATCGCCACAGCATAAAGAAGAACCTCATTGGCGCCCTCCTGTT  
 -----  
 CACGGCTCGTTTTTTAAGTTTTCAAGACCCGTTATGGCTAGCGGTGTCGTATTTCTTCTTGGAGTAACCGCGGGAGGACAA

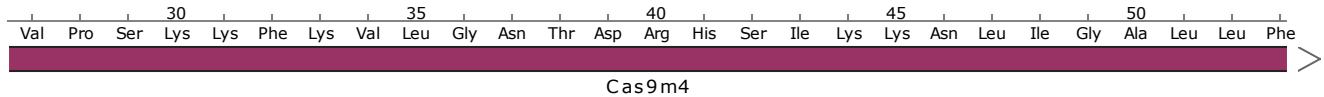

CGACTCCGGGGAGACGGCCGAAGCCACGCGGCTCAAAGAAGCAGCACGGCGCAGATATACCCGCAGAAAGAATCGGATCT  
 -----  
 GCTGAGGCCCTCTGCCGGCTTCGGTGCGCCGAGTTTTCTTGTGCTGCCGCGTCTATATGGGCGTCTTTCTTAGCCTAGA

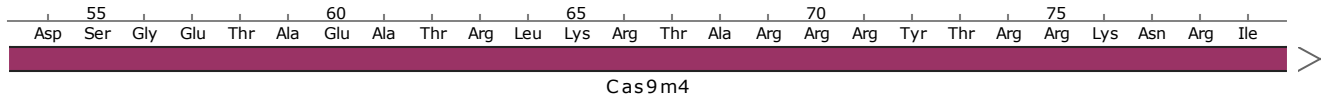

GCTACCTGCAGGAGATCTTTAGTAATGAGATGGCTAAGGTGGATGACTCTTTCTTCCATAGGCTGGAGGAGTCCTTTTTG  
 -----  
 CGATGGACGTCCTCTAGAAATCATTACTCTACCGATTCCACCTACTGAGAAAGAAGGTATCCGACCTCCTCAGGAAAAAC

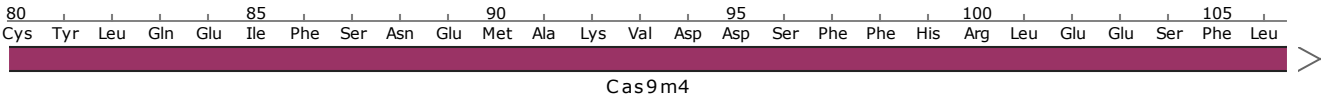

GTGGAGGAGGATAAAAAAGCACGAGCGCCACCCAATCTTTGGCAATATCGTGGACGAGGTGGCGTACCATGAAAAGTACCC  
 -----  
 CACCTCCTCCTATTTTTTCGTGCTCGCGGTGGGTTAGAAAACCGTTATAGCACCTGCTCCACCGCATGGTACTTTTTTCATGGG  
 110 115 120 125 130  
 Val Glu Glu Asp Lys Lys His Glu Arg His Pro Ile Phe Gly Asn Ile Val Asp Glu Val Ala Tyr His Glu Lys Tyr Pro  
 Cas9m4

2640

AACCATATATCATCTGAGGAAGAAGCTTGTAGACAGTACTGATAAGGCTGACTTGCGGTTGATCTATCTCGCGCTGGCGC  
 -----  
 TTGGTATATAGTAGACTCCTTCTTCGAACATCTGTTCATGACTATTCCGACTGAACGCCAACTAGATAGAGCGCGACCGCG  
 135 140 145 150 155  
 Thr Ile Tyr His Leu Arg Lys Lys Leu Val Asp Ser Thr Asp Lys Ala Asp Leu Arg Leu Ile Tyr Leu Ala Leu Ala  
 Cas9m4

2720

ATATGATCAAATTTTCGGGGACACTTCTCATCGAGGGGGACCTGAACCCAGACAACAGCGATGTTCGACAAACTCTTTATC  
 -----  
 TATACTAGTTTAAAGCCCCCTGTGAAGGAGTAGCTCCCCCTGGACTTGGGTCTGTTGTTCGCTACAGCTGTTTGAGAAATAG  
 160 165 170 175 180 185  
 His Met Ile Lys Phe Arg Gly His Phe Leu Ile Glu Gly Asp Leu Asn Pro Asp Asn Ser Asp Val Asp Lys Leu Phe Ile  
 Cas9m4

2800

CAACTGGTTCAGACTTACAATCAGCTTTTTCGAAGAGAACCCGATCAACGCATCCGGAGTTGACGCCAAAGCAATCCTGAG  
 -----  
 GTTGACCAAGTCTGAATGTTAGTCGAAAAGCTTCTCTTGGGCTAGTTGCGTAGGCCCTCAACTGCGGTTTTCGTTAGGACTC  
 190 195 200 205 210  
 Gln Leu Val Gln Thr Tyr Asn Gln Leu Phe Glu Glu Asn Pro Ile Asn Ala Ser Gly Val Asp Ala Lys Ala Ile Leu Ser  
 Cas9m4

2880

CGCTAGGCTGTCCAAATCCCAGCGGCTCGAAAACCTCATCGCACAGCTCCCTGGGGAGAAGAAGAACGGCCTGTTTGGTA  
 -----  
 GCGATCCGACAGGTTTAGGGCCGCGGAGCTTTTGGAGTAGCGTGTTCGAGGGACCCCTCTTCTTCTTGGCGGACAAACCAT  
 215 220 225 230 235  
 Ala Arg Leu Ser Lys Ser Arg Arg Leu Glu Asn Leu Ile Ala Gln Leu Pro Gly Glu Lys Lys Asn Gly Leu Phe Gly  
 Cas9m4

2960

ATCTTATCGCCCTGTCACTCGGGCTGACCCCAACTTTAAATCTAACTTCGACCTGGCCGAAGATGCCAAGCTTCAACTG  
 -----  
 TAGAATAGCGGGACAGTGAGCCCGACTGGGGGTTGAAATTTAGATTGAAGCTGGACCGGCTTCTACGGTTTCGAAGTTGAC  
 240 245 250 255 260 265  
 Asn Leu Ile Ala Leu Ser Leu Gly Leu Thr Pro Asn Phe Lys Ser Asn Phe Asp Leu Ala Glu Asp Ala Lys Leu Gln Leu  
 Cas9m4

3040

AGCAAAGACACCTACGATGATGATCTCGACAATCTGCTGGCCAGATCGGCGACCAGTACGCAGACCTTTTTTTGGCGGC  
 -----  
 TCGTTTTCTGTGGATGCTACTACTAGAGCTGTTAGACGACCGGGTCTAGCCGCTGGTTCATGCGTCTGGAAAAAAACCGCCG  
 270 275 280 285 290  
 Ser Lys Asp Thr Tyr Asp Asp Asp Leu Asp Asn Leu Leu Ala Gln Ile Gly Asp Gln Tyr Ala Asp Leu Phe Leu Ala Ala  
 Cas9m4

3120

AAAGAACCTGTCAGACGCCATTCTGCTGAGTGATATTCTGCGAGTGAACACGGAGATCACCAAAGCTCCGCTGAGCGCTA  
 -----  
 TTTCTTGGACAGTCTGCGGTAAGACGACTCACTATAAGACGCTCACTTGTGCCTCTAGTGGTTTTTCGAGGCGACTCGCGAT  
 295 300 305 310 315  
 Lys Asn Leu Ser Asp Ala Ile Leu Leu Ser Asp Ile Leu Arg Val Asn Thr Glu Ile Thr Lys Ala Pro Leu Ser Ala  
 Cas9m4

3200

GTATGATCAAGCGCTATGATGAGCACCACCAAGACTTGGACTTTGCTGAAGGCCCTTGTTCAGACAGCAACTGCCTGAGAAG  
 CATACTAGTTTCGCGATACTACTCGTGGTGGTTCTGAACTGAAACGACTTCCGGGAACAGTCTGTCTGTTGACGGACTCTTC  
 320 Ser Met Ile Lys Arg Tyr Asp Glu His His Gln Asp Leu Thr Leu Leu Lys Ala Leu Val Arg Gln Gln Leu Pro Glu Lys

Cas9m4

TACAAGGAAATTTTCTTCGATCAGTCTAAAAATGGCTACGCCGGATACATTGACGGCGGAGCAAGCCAGGAGGAATTTTA  
 ATGTTCTCTTTAAAAGAAGCTAGTCAGATTTTTACCGATGCGGCCTATGTAAGTGCCTCGTTCGGTCTCTCTAAAAT  
 350 Tyr Lys Glu Ile Phe Phe Asp Gln Ser Lys Asn Gly Tyr Ala Gly Tyr Ile Asp Gly Gly Ala Ser Gln Glu Glu Phe Tyr

Cas9m4

CAAATTTATTAAGCCCATCTTGGAAAAAATGGACGGCACCGAGGAGCTGCTGGTAAAGCTTAACAGAGAAGATCTGTTGC  
 GTTTAAATAATTCGGGTAGAACCCTTTTTTACCTGCCGTGGCTCCTCGACGACCATTTTGAATTGTCTCTTCTAGACAACG  
 375 Lys Phe Ile Lys Pro Ile Leu Glu Lys Met Asp Gly Thr Glu Glu Leu Leu Val Lys Leu Asn Arg Glu Asp Leu Leu

Cas9m4

GCAAACAGCGCACTTTTCGACAATGGAAGCATCCCCCACCAGATTCACCTGGGCGAACTGCACGCTATCCTCAGGCGGCAA  
 CGTTTGTGCGGTGAAAGCTGTTACCTTCGTAGGGGGTGGTCTAAGTGGACCCGCTTGACGTGCGATAGGAGTCCGCCGTT  
 400 Arg Lys Gln Arg Thr Phe Asp Asn Gly Ser Ile Pro His Gln Ile His Leu Gly Glu Leu His Ala Ile Leu Arg Arg Gln

Cas9m4

GAGGATTTCTACCCCTTTTTGAAAGATAACAGGGAAAAGATTGAGAAAATCCTCACATTTTCGGATACCCTACTATGTAGG  
 CTCCTAAAGATGGGGAAAAAATTTCTATTGTCCCTTTTCTAACTCTTTTAGGAGTGTAAGCCTATGGGATGATACATCC  
 430 Glu Asp Phe Tyr Pro Phe Leu Lys Asp Asn Arg Glu Lys Ile Glu Lys Ile Leu Thr Phe Arg Ile Pro Tyr Tyr Val Gly

Cas9m4

CCCCCTCGCCCGGGGAAATTCAGATTGCGGTGGATGACTCGCAAATCAGAAGAGACCATCACTCCCTGGAACCTTCGAGG  
 GGGGGAGCGGGCCCTTTAAGGTCTAAGCGCACCTACTGAGCGTTTAGTCTTCTCTGGTAGTGAGGGACCTTGAAGCTCC  
 455 Pro Leu Ala Arg Gly Asn Ser Arg Phe Ala Trp Met Thr Arg Lys Ser Glu Glu Thr Ile Thr Pro Trp Asn Phe Glu

Cas9m4

AAGTCGTGGATAAGGGGGCCTCTGCCAGTCCTTCATCGAAAGGATGACTAACTTTGATAAAAAATCTGCCTAACGAAAAG  
 TTCAGCACCTATTTCCCGGAGACGGGTGAGGAAGTAGCTTCTACTGATTGAAACTATTTTTAGACGGATTGCTTTTC  
 480 Glu Val Val Asp Lys Gly Ala Ser Ala Gln Ser Phe Ile Glu Arg Met Thr Asn Phe Asp Lys Asn Leu Pro Asn Glu Lys

Cas9m4

GTGCTTCCTAAACACTCTCTGCTGTACGAGTACTTCACAGTTTATAACGAGCTCACCAAGGTCAAATACGTACAGAAAG  
 CACGAAGGATTTGTGAGAGACGACATGCTCATGAAGTGTCAAATATTGCTCGAGTGGTTCCAGTTTATGCAGTGCTTTCC  
 510 Val Leu Pro Lys His Ser Leu Leu Tyr Glu Tyr Phe Thr Val Tyr Asn Glu Leu Thr Lys Val Lys Tyr Val Thr Glu Gly

Cas9m4



GATGAGAAAGCCAGCATTCTGTCTGGAGAGCAGAAGAAAGCTATCGTGGACCTCCTCTTCAAGACGAACCGGAAAGTTA  
 CTACTCTTTTCGGTTCGTAAGGACAGACCTCTCGTCTTCTTTTCGATAGCACCTGGAGGAGAAGTTCTGCTTGGCCTTTCAAT

3920

535 540 545 550 555  
 Met Arg Lys Pro Ala Phe Leu Ser Gly Glu Gln Lys Lys Ala Ile Val Asp Leu Leu Phe Lys Thr Asn Arg Lys Val

Cas9m4

CCGTGAAACAGCTCAAAGAgGACTATTTCAAAAAGATTGAATGTTTCGACTCTGTTGAAATCAGCGGAGTGGAGGATCGC  
 GGCACCTTTGTTCGAGTTTCTcCTGATAAAGTTTTTCTAACTTACAAAGCTGAGACAACCTTTAGTCGCCTCACCTCCTAGCG

4000

560 565 570 575 580 585  
 Thr Val Lys Gln Leu Lys Glu Asp Tyr Phe Lys Lys Ile Glu Cys Phe Asp Ser Val Glu Ile Ser Gly Val Glu Asp Arg

Cas9m4

TTCAACGCATCCCTGGGAACGTATCACGATCTCCTGAAAATCATTAAAGACAAGGACTTCTGGACAATGAGGAGAACGA  
 AAGTTGCGTAGGGACCTTGCATAGTGCTAGAGGACTTTTAGTAATTTCTGTTTCTGAAGGACCTGTTACTCCTCTTGCT

4080

590 595 600 605 610  
 Phe Asn Ala Ser Leu Gly Thr Tyr His Asp Leu Leu Lys Ile Ile Lys Asp Lys Asp Phe Leu Asp Asn Glu Glu Asn Glu

Cas9m4

GGACATTCTTGAGGACATTGTCCTCACCCCTTACGTTGTTTGAAGATAGGGAGATGATTGAAGAACGCTTGAAAACCTTACG  
 CCTGTAAGAACTCCTGTAACAGGAGTGGGAATGCAACAAACTTCTATCCCTCTACTAACTTCTTGCGAACTTTTGAATGC

4160

615 620 625 630 635  
 Asp Ile Leu Glu Asp Ile Val Leu Thr Leu Thr Leu Phe Glu Asp Arg Glu Met Ile Glu Glu Arg Leu Lys Thr Tyr

Cas9m4

CTCATCTCTTCGACGACAAAAGTCATGAAACAGCTCAAGAGGCGCGGATATACAGGATGGGGGCGGCTGTCAAGAAAACCTG  
 GAGTAGAGAAGCTGCTGTTTCAGTACTTTGTTCGAGTTCTCCGCGGCTATATGTCCTACCCCGCGGACAGTTCTTTTGAC

4240

640 645 650 655 660 665  
 Ala His Leu Phe Asp Asp Lys Val Met Lys Gln Leu Lys Arg Arg Arg Tyr Thr Gly Trp Gly Arg Leu Ser Arg Lys Leu

Cas9m4

ATCAATGGGATCCGAGACAAGCAGAGTGGAAAGACAATCCTGGATTTTCTTAAGTCCGATGGATTTGCCAACCGGAACTT  
 TAGTTACCCTAGGCTCTGTTTCGTCTCACCTTTCTGTTAGGACCTAAAAGAATTCAGGCTACCTAAACGGTTGGCCTTGAA

4320

670 675 680 685 690  
 Ile Asn Gly Ile Arg Asp Lys Gln Ser Gly Lys Thr Ile Leu Asp Phe Leu Lys Ser Asp Gly Phe Ala Asn Arg Asn Phe

Cas9m4

CATGCAGTTGATCCATGATGACTCTCTCACCTTTAAGGAGGACATCCAGAAAGCACAAGTTTCTGGCCAGGGGGACAGTC  
 GTACGTCAACTAGGTACTACTGAGAGAGTGGAAATTCCTCCTGTAGGCTTTTCGTGTTCAAAGACCGGTTCCCTCTGTCAG

4400

695 700 705 710 715  
 Met Gln Leu Ile His Asp Asp Ser Leu Thr Phe Lys Glu Asp Ile Gln Lys Ala Gln Val Ser Gly Gln Gly Asp Ser

Cas9m4

TcCACGAGCACATCGCTAATCTTGCAGGTAGCCCAGCTATCAAAAAGGGAATACTGCAGACCGTTAAGGTCGTGGATGAA  
 AgGTGCTCGTGTAGCGATTAGAAGTCCATCGGGTCGATAGTTTTTCCCTTATGACGTCTGGCAATTCAGCACCTACTT

4480

720 725 730 735 740 745  
 Leu His Glu His Ile Ala Asn Leu Ala Gly Ser Pro Ala Ile Lys Lys Gly Ile Leu Gln Thr Val Lys Val Val Asp Glu

Cas9m4

CTCGTCAAAGTAATGGGAAGGCATAAGCCCCGAGAATATCGTTATCGAGATGGCCCGAGAGAACCAAACTACCCAGAAGGG  
 GAGCAGTTTCATTACCCCTTCCGTATTCGGGCTCTTATAGCAATAGCTCTACCCGGGCTCTCTTGGTTTGATGGGTCTTCCC  
 Leu Val Lys Val Met Gly Arg His Lys Pro Glu Asn Ile Val Ile Glu Met Ala Arg Glu Asn Gln Thr Thr Gln Lys Gly  
 Cas9m4

ACAGAAGAACAGTAGGGAAAGGATGAAGAGGATTGAAGAGGGTATAAAAGAACTGGGGTCCCAAATCCTTAAGGAACACC  
 TGTCTTCTTGTTCATCCCTTCTACTTCTCCTAACTTCTCCCATATTTCTTGACCCCAAGGGTTTAGGAATTCCTTGTGG  
 Gln Lys Asn Ser Arg Glu Arg Met Lys Arg Ile Glu Glu Gly Ile Lys Glu Leu Gly Ser Gln Ile Leu Lys Glu His  
 Cas9m4

CAGTTGAAAACACCCAGCTTCAGAATGAGAAGCTCTACCTGTACTACCTGCAGAACGGCAGGGACATGTACGTGGATCAG  
 GTCAACTTTTGTGGGTCGAAGTCTTACTCTTCGAGATGGACATGATGGACGTCTTGCCGTCCCTGTACATGCACCTAGTC  
 Pro Val Glu Asn Thr Gln Leu Gln Asn Glu Lys Leu Tyr Leu Tyr Tyr Leu Gln Asn Gly Arg Asp Met Tyr Val Asp Gln  
 Cas9m4

GAACTGGACATCAATCGGCTCTCCGACTACGACGTGGCTGCTATCGTGCCCCAGTCTTTTCTCAAAGATGATTCTATTGA  
 CTTGACCTGTAGTTAGCCGAGAGGCTGATGCTGCACCGACGATAGCACGGGGTCAGAAAAGAGTTTCTACTAAGATAACT  
 Glu Leu Asp Ile Asn Arg Leu Ser Asp Tyr Asp Val Ala Ala Ile Val Pro Gln Ser Phe Leu Lys Asp Ser Ile Asp  
 Cas9m4

TAATAAAGTGTGGACAAGATCCGATAAAgcTAGAGGGAAAGAGTGATAACGTCCCCTCAGAAGAAGTTGTCAAGAAAATGA  
 ATTATTTTCAAACTGTTCTAGGCTATTTcgATCTCCCTTCTCACTATTGCAGGGGAGTCTTCTTCAACAGTTCTTTTACT  
 Asn Lys Val Leu Thr Arg Ser Asp Lys Ala Arg Gly Lys Ser Asp Asn Val Pro Ser Glu Glu Val Val Lys Lys Met  
 Cas9m4

AAAATTATTGGCGGCAGCTGCTGAACGCCAAACTGATCACACAACCGGAAGTTCGATAATCTGACTAAGGCTGAACGAGGT  
 TTTTAATAACCGCCGTCGACGACTTGCGGTTTGGACTAGTGTGTTGCCTTCAAGCTATTAGACTGATTCCGACTTGCTCCA  
 Lys Asn Tyr Trp Arg Gln Leu Leu Asn Ala Lys Leu Ile Thr Gln Arg Lys Phe Asp Asn Leu Thr Lys Ala Glu Arg Gly  
 Cas9m4

GGCCTGTCTGAGTTGGATAAAGCCGGCTTCATCAAAAGGCAGCTTGTGAGACACGCCAGATCACCAAGCACGTGGCCCA  
 CCGGACAGACTCAACCTATTTCCGGCCGAAGTAGTTTTCCGTGCAACAACCTCTGTGCGGTCTAGTGGTTCTGTCACCCGGGT  
 Gly Leu Ser Glu Leu Asp Lys Ala Gly Phe Ile Lys Arg Gln Leu Val Glu Thr Arg Gln Ile Thr Lys His Val Ala Gln  
 Cas9m4

AATTCTCGATTACGCATGAACACCAAGTACGATGAAAATGACAAACTGATTCGAGAGGTGAAAGTTATTACTCTGAAGT  
 TTAAGAGCTAAGTGCCTACTTGTGGTTTCATGCTACTTTTACTGTTTACTAAGCTCTCCACTTTCAATAATGAGACTTCA  
 Ile Leu Asp Ser Arg Met Asn Thr Lys Tyr Asp Glu Asn Asp Lys Leu Ile Arg Glu Val Lys Val Ile Thr Leu Lys  
 Cas9m4

CTAAGCTGGTCTCAGATTTTCAGAAAGGACTTTTCAGTTTTATAAGGTGAGAGAGATCAACAATTACCACCATGCGCATGAT  
 GATTCGACCAGAGTCTAAAGTCTTTCCTGAAAAGTCAAAATATTCCACTCTCTCTAGTTGTTAATGGTGGTACGCGTACTA  
 960 Ser Lys Leu Val Ser Asp Phe Arg Lys Asp Phe Gln Phe Tyr Lys Val Arg Glu Ile Asn Asn Tyr His His Ala His Asp

Cas9m4

GCCTACCTGAATGCAGTGGTAGGCACTGCACCTTATCAAAAAATATCCCAAGCTTGAATCTGAATTTGTTTACGGAGACTA  
 CGGATGGACTTACGTCACCATCCGTGACGTGAATAGTTTTTTATAGGGTTCGAACTTAGACTTAAACAAATGCCTCTGAT  
 990 Ala Tyr Leu Asn Ala Val Val Gly Thr Ala Leu Ile Lys Lys Tyr Pro Lys Leu Glu Ser Glu Phe Val Tyr Gly Asp Tyr

Cas9m4

TAAAGTGTACGATGTTAGGAAAATGATCGCAAAGTCTGAGCAGGAAATAGGCAAGGCCACCGCTAAGTACTTCTTTTACA  
 ATTTACATGCTACAATCCTTTTACTAGCGTTTCAGACTCGTCTTTTATCCGTTCCGGTGGCGATTATGAAGAAAATGT  
 1015 Lys Val Tyr Asp Val Arg Lys Met Ile Ala Lys Ser Glu Gln Glu Ile Gly Lys Ala Thr Ala Lys Tyr Phe Phe Tyr

Cas9m4

GCAATATTATGAATTTTTTCAAGACCGAGATTACACTGGCCAATGGAGAGATTCGGAAGCGACCACTTATCGAAACAAAC  
 CGTTATAATACTTAAAAAAGTTCTGGCTCTAATGTGACCGGTTACCTCTCTAAGCCTTCGCTGGTGAATAGCTTTGTTTG  
 1040 Ser Asn Ile Met Asn Phe Phe Lys Thr Glu Ile Thr Leu Ala Asn Gly Glu Ile Arg Lys Arg Pro Leu Ile Glu Thr Asn

Cas9m4

GGAGAAACAGGAGAAAATCGTGTGGGACAAGGGTAGGGATTTTCGCGACAGTCCGGAAGGTCCTGTCCATGCCGCAGGTGAA  
 CCTCTTTGTCCTCTTTAGCACACCCTGTTCCCATCCCTAAAGCGCTGTGACGGCCTTCAGGACAGGTACGGCGTCCACTT  
 1070 Gly Glu Thr Gly Glu Ile Val Trp Asp Lys Gly Arg Asp Phe Ala Thr Val Arg Lys Val Leu Ser Met Pro Gln Val Asn

Cas9m4

CATCGTTAAAAAGACCGAAGTACAGACCGGAGGCTTCTCCAAGGAAAGTATCCTCCCGAAAAGGAACAGCGACAAGCTGA  
 GTAGCAATTTTTCTGGCTTCATGTCTGGCCTCCGAAGAGGTTCTTTTCATAGGAGGGCTTTTCTTGTGCTGTTTCGACT  
 1095 Ile Val Lys Lys Thr Glu Val Gln Thr Gly Gly Phe Ser Lys Glu Ser Ile Leu Pro Lys Arg Asn Ser Asp Lys Leu

Cas9m4

TCGCACGCAAAAAAGATTGGGACCCCAAGAAATACGGCGGATTCGATTCTCCTACAGTCGCTTACAGTGTACTGGTTGTG  
 AGCGTGCCTTTTTTCTAACCTGGGGTCTTTTATGCCGCCAAGCTAAGAGGATGTGACGGAATGTCACATGACCAACAC  
 1120 Ile Ala Arg Lys Lys Asp Trp Asp Pro Lys Lys Tyr Gly Gly Phe Asp Ser Pro Thr Val Ala Tyr Ser Val Leu Val Val

Cas9m4

GCCAAAGTGGAGAAAGGGAAGTCTAAAAAAGTCAAAAGCGTCAAGGAACTGCTGGGCATCACAATCATGGAGCGATCAAG  
 CGGTTTCACCTCTTTCCCTTCAGATTTTTTGTAGTTTTTCGAGTTCTTTGACGACCCGTAGTGTAGTACCTCGCTAGTTT  
 1150 Ala Lys Val Glu Lys Gly Lys Ser Lys Lys Leu Lys Ser Val Lys Glu Leu Leu Gly Ile Thr Ile Met Glu Arg Ser Ser

Cas9m4

CTTCGAAAAAAACCCCATCGACTTTCTCGAGGGCGAAAGGATATAAAGAGGGTCAAAAAAGACCTCATCATTAAAGCTTCCCA  
GAAGCTTTTTTTGGGGTAGCTGAAAGAGCTCCGCTTTCTATATTTCTCCAGTTTTTTCTGGAGTAGTAATTCGAAGGGT

5840

1175 1180 1185 1190 1195  
Phe Glu Lys Asn Pro Ile Asp Phe Leu Glu Ala Lys Gly Tyr Lys Glu Val Lys Lys Asp Leu Ile Ile Lys Leu Pro

Cas9m4

AGTACTCTCTCTTTGAGCTTGAAAACGGCCGAAACGAATGCTCGCTAGTGC GGCGAGCTGCAGAAAAGGTAACGAGCTG  
TCATGAGAGAGAAACTCGAACTTTTGCCGGCCTTTGCTTACGAGCGATCACGCCCGCTCGACGCTTTTCCATTGCTCGAC

5920

1200 1205 1210 1215 1220 1225  
Lys Tyr Ser Leu Phe Glu Leu Glu Asn Gly Arg Lys Arg Met Leu Ala Ser Ala Gly Glu Leu Gln Lys Gly Asn Glu Leu

Cas9m4

GCACTGCCCTCTAAATACGTTAATTTCTTGTATCTGGCCAGCCACTATGAAAAGCTCAAAGGGTCTCCCGAAGATAATGA  
CGTGACGGGAGATTTATGCAATTAAGAACATAGACCGGTGCGGTGATACTTTTCGAGTTTTCCAGAGGGCTTCTATTACT

6000

1230 1235 1240 1245 1250  
Ala Leu Pro Ser Lys Tyr Val Asn Phe Leu Tyr Leu Ala Ser His Tyr Glu Lys Leu Lys Gly Ser Pro Glu Asp Asn Glu

Cas9m4

GCAGAAGCAGCTGTTTCGTGGAACAACACAAACACTACCTTGATGAGATCATCGAGCAAATAAGCGAATTCTCCAAAAGAG  
CGTCTTCGTGACAAGCACCTTGTGTGTTGTGATGGAACACTACTCTAGTCTGTTTATTCGCTTAAGAGGTTTTTCTC

6080

1255 1260 1265 1270 1275  
Gln Lys Gln Leu Phe Val Glu Gln His Lys His Tyr Leu Asp Glu Ile Ile Glu Gln Ile Ser Glu Phe Ser Lys Arg

Cas9m4

TGATCCTCGCCGACGCTAACCTCGATAAGGTGCTTTCTGCTTACAATAAGCACAGGGATAAGCCCATCAGGGAGCAGGCA  
ACTAGGAGCGGCTGCGATTGGAGCTATTCCACGAAAGACGAATGTTATTTCGTGTCCCTATTCGGGTAGTCCCTCGTCCGT

6160

1280 1285 1290 1295 1300 1305  
Val Ile Leu Ala Asp Ala Asn Leu Asp Lys Val Leu Ser Ala Tyr Asn Lys His Arg Asp Lys Pro Ile Arg Glu Gln Ala

Cas9m4

GAAAACATTATCCACTTGTACTCTGACCAACTTGGGCGCGCCTGCAGCCTTCAAGTACTTCGACACCACCATAGACAG  
CTTTTGTAAATAGGTGAACAAATGAGACTGGTTGAACCCGCGCGGACGTGGAAGTTCATGAAGCTGTGGTGGTATCTGTC

6240

1310 1315 1320 1325 1330  
Glu Asn Ile Ile His Leu Phe Thr Leu Thr Asn Leu Gly Ala Pro Ala Ala Phe Lys Tyr Phe Asp Thr Thr Ile Asp Arg

Cas9m4

AAAGCGGTACACCTCTACAAAGGAGGTCCTGGACGCCACACTGATTCATCAGTCAATTACGGGGCTCTATGAAACAAGAA  
TTTCGCCATGTGGAGATGTTTCTCCAGGACCTGCGGTGTGACTAAGTAGTCAGTTAATGCCCCGAGATACTTTGTTCTT

6320

1335 1340 1345 1350 1355  
Lys Arg Tyr Thr Ser Thr Lys Glu Val Leu Asp Ala Thr Leu Ile His Gln Ser Ile Thr Gly Leu Tyr Glu Thr Arg

Cas9m4

TCGACCTCTCTCAGCTCGGTGGAGACAGCAGGGCTGACCCCAAGAAGAAGAGGAAGGTGGctagCGATGCTAAGTCACTG  
AGCTGGAGAGAGTCGAGCCACCTCTGTCTGTCGCTCCGACTGGGGTTCTTCTTCTCCTTCCACCgatcGCTACGATTCACTGAC

6400

1360 1365 130  
Ile Asp Leu Ser Gln Leu Gly Gly Asp Ser Arg Ala Asp Pro Lys Lys Lys Arg Lys Val Ala Ser Asp Ala Lys Ser Leu

Cas9m4

SV40 NLS

(in frame with SV40 NLS)

ACTGCCTGGTCCCGGACACTGGTGACCTTCAAGGATGTGTTTGTGGACTTCACCAGGGAGGAGTGGAAAGCTGCTGGACAC 6480  
 TGACGGACCAGGGCCTGTGACCACTGGAAGTTCCTACACAAACACCTGAAGTGGTCCCTCCTCACCTTCGACGACCTGTG  
 Thr Ala Trp Ser Arg Thr Leu Val Thr Phe Lys Asp Val Phe Val Asp Phe Thr Arg Glu Glu Trp Lys Leu Leu Asp Thr  
 -----> **KRAB** >

TGCTCAGCAGATCCTGTACAGAAATGTGATGCTGGAGAACTATAAGAACCTGGTTTCCTTGGGTTATCAGCTTACTAAGC 6560  
 ACGAGTCGTCTAGGACATGTCTTTACACTACGACCTCTTGATATTCTTGGACCAAAGGAACCCAATAGTCGAATGATTTCG  
 Ala Gln Gln Ile Leu Tyr Arg Asn Val Met Leu Glu Asn Tyr Lys Asn Leu Val Ser Leu Gly Tyr Gln Leu Thr Lys  
 -----> **KRAB** >

CAGATGTGATCCTCCGGTTGGAGAAGGGAGAAGAGCCCTGGCTGGTGGAGAGAGAAATTCACCAAGAGACCCATCCTGAT 6640  
 GTCTACACTAGGAGGCCAACCTCTTCCCTCTTCTCGGGACCGACCACCTCTCTCTTTAAGTGGTTCTCTGGGTAGGACTA  
 60 Pro Asp Val Ile Leu Arg Leu Glu Lys Gly Glu Glu Pro Trp Leu Val Glu Arg Glu Ile His Gln Glu Thr His Pro Asp  
 -----> **KRAB** (in frame with KRAB) ----->

TCAGAGACTGCATTTGAAATCAAATCATCAGTTCCGAAAAAGAAACGCAAAGtTGctagCtgaTAAGaattcctagagct 6720  
 AGTCTCTGACGTAAACTTTAGTTTAGTAGTCAAGGCTTTTTCTTTGCGTTTCaaCgatcGactATTCTtaaggatctcga  
 Ser Glu Thr Ala Phe Glu Ile Lys Ser Ser Val Pro Lys Lys Lys Arg Lys Val Ala Ser \*  
 -----> (in frame with KRAB) -----> **SV40 NLS** ----->

cgctgatcagcctcgactgtgccttctagtggccagccatctgttgtttgccctcccccgctgccttccttgaccctgga 6800  
 gcgactagtccggagctgacacggaagatcaacggtcggtagacaacaaacggggagggggcacggaaggaactgggacct  
 -----> **bGH poly(A) signal** ----->

aggtgccactcccactgtcctttcctaataaaaatgaggaaattgcatcgcattgtctgagtaggtgtcattctattctgg 6880  
 tccacggtgagggtgacaggaaggattatcttactcctttaaactagcgtaacagactcatccacagtaagataagacc  
 -----> **bGH poly(A) signal** ----->

gggggtgggggtggggcaggacagcaagggggaggattgggaagagaatagcaggcatgctggggagcggccAACgtacgca 6960  
 cccacccccaccccgctcctgtcgttccccctcctaacccttctcttatcgtccgtacgacccctcgccggTTGcatgctg  
 -----> **bGH poly(A) signal** ----->

GCggccGC 3'  
 ----- 6968  
 CGccggCG 5'

**Supplementary Figure S3. DESKGEN on-target and off-target analysis of *Tnfsf11*-targeted sgRNAs.**

*Tnfsf11*-sg1

| Sequence             | PAM | Exon | Activity | Off-target |
|----------------------|-----|------|----------|------------|
| GGAGGCCAGCTCTCTCCAGG | AGG | P    | 73       | 14         |

**Guide Details**

|            |                                   |
|------------|-----------------------------------|
| Cut site   | chr14 [+78,308,081 : -78,308,081] |
| GC %       | 70                                |
| Activity   | 73                                |
| Off-target | 14                                |

OFF-TARGET ANALYSIS:

| Mismatches | 0 | 1 | 2  | 3   | Total |
|------------|---|---|----|-----|-------|
| Coding     | 0 | 0 | 0  | 0   | 0     |
| Non-Coding | 0 | 5 | 69 | 598 | 672   |

OFF-TARGET HITS:

| Sequence             | PAM | Similarity | Mism. | Gene | Locus                     |
|----------------------|-----|------------|-------|------|---------------------------|
| GGAGGCCAGCTCTCTCCAGG | TGG | 32         | 19    | No   | chrX@ 108697291-108697314 |
| GGAGGCCAGCTCTCTCCAGG | TGG | 32         | 19    | No   | chrX@ 20108906-20108929   |
| GGAGGCCAGCTCTCTCCAAG | TGG | 32         | 19    | No   | chr18@ 39797402-39797425  |
| GGAGGCCAGCTCTCTCCGCG | AGG | 20         | 18    | No   | chr15@ 33061846-33061869  |
| GGAGGCCAGCTCTCTCCCCG | TGG | 20         | 18    | No   | chr9@ 9132446-9132469     |
| GGAGACCAGCTCTCTCCACA | CAG | 6          | 5,20  | No   | chr17@ 23435687-23435710  |
| GGAGACCAGCTCTCTCCACT | CAG | 6          | 5,20  | No   | chr17@ 23362771-23362794  |
| GGAGTCCAGCTCTCTCCACA | CAG | 6          | 5,20  | No   | chr9@ 62856165-62856188   |
| GAAGGCCAGCTCTCTCCAGG | TGG | 6          | 2,19  | No   | chrX@ 118850871-118850894 |
| GGTGGCCAGCTCTCTCCAGG | AGG | 5          | 3,19  | No   | chr15@ 61496638-61496661  |
| GGGGGCCAGCTCTCTCCAGG | CAG | 5          | 3,19  | No   | chr7@ 18083920-18083943   |
| GGAGACCAGCTCTCTCCAGG | AAG | 4          | 5,19  | No   | chrX@ 132668125-132668148 |
| GGAGACCAGCTCTCTCCAGG | CAG | 4          | 5,19  | No   | chrX@ 104331095-104331118 |
| GGAGTCCAGCTCTCTCCAGG | TGG | 4          | 5,19  | No   | chrX@ 115474805-115474828 |

| Sequence             | PAM | Similarity | Mism. | Gene | Locus                      |
|----------------------|-----|------------|-------|------|----------------------------|
| GGAGACCAGCTCTCTCCAGG | CAG | 4          | 5,19  | No   | chrX@ 162436757-162436780  |
| GGAGACCAGCTCTCTCCAGG | AGG | 4          | 5,19  | No   | chrX@ 158080260-158080283  |
| GGAGACCAGCTCTCTCCAGG | TGG | 4          | 5,19  | No   | chrX@ 16246963-16246986    |
| GGAGACCAGCTCTCTCCAGG | TGG | 4          | 5,19  | No   | chrX@ 16111349-16111372    |
| GGAGACCAGCTCTCTCCAGG | CAG | 4          | 5,19  | No   | chr18@ 17560826-17560849   |
| GGAGACCAGCTCTCTCCAGG | CAG | 4          | 5,19  | No   | chr18@ 15374510-15374533   |
| GGAGACCAGCTCTCTCCAGG | AGG | 4          | 5,19  | No   | chr17@ 81258623-81258646   |
| GGAGACCAGCTCTCTCCAGG | AGG | 4          | 5,19  | No   | chr17@ 53050125-53050148   |
| GGAGACCAGCTCTCTCCAGG | CGG | 4          | 5,19  | No   | chr16@ 56141624-56141647   |
| GGAGACCAGCTCTCTCCAGG | CGG | 4          | 5,19  | No   | chr16@ 35876138-35876161   |
| GGAGACCAGCTCTCTCCAGG | CGG | 4          | 5,19  | No   | chr14@ 112135213-112135236 |
| GGAGACCAGCTCTCTCCAGG | AAG | 4          | 5,19  | No   | chr14@ 8829035-8829058     |
| GGAGACCAGCTCTCTCCAGG | TGG | 4          | 5,19  | No   | chr12@ 109128063-109128086 |
| GGAGACCAGCTCTCTCCAGG | AAG | 4          | 5,19  | No   | chr12@ 45247102-45247125   |
| GGAGACCAGCTCTCTCCAGG | TGG | 4          | 5,19  | No   | chr10@ 125469397-125469420 |
| GGAGACCAGCTCTCTCCAGG | CAG | 4          | 5,19  | No   | chr10@ 17187475-17187498   |
| GGAGACCAGCTCTCTCCAGG | CAG | 4          | 5,19  | No   | chr10@ 78766165-78766188   |
| GGAGACCAGCTCTCTCCAGG | TAG | 4          | 5,19  | No   | chr10@ 57550598-57550621   |
| GGAGACCAGCTCTCTCCAGG | TGG | 4          | 5,19  | No   | chr9@ 37973121-37973144    |
| GGAGACCAGCTCTCTCCAGG | TGG | 4          | 5,19  | No   | chr8@ 59557762-59557785    |
| GGAGACCAGCTCTCTCCAGG | TGG | 4          | 5,19  | No   | chr8@ 73742415-73742438    |
| GGAGACCAGCTCTCTCCAGG | CAG | 4          | 5,19  | No   | chr7@ 129906529-129906552  |
| GGAGACCAGCTCTCTCCAGG | CAG | 4          | 5,19  | No   | chr7@ 65184338-65184361    |
| GGAGACCAGCTCTCTCCAGG | AGG | 4          | 5,19  | No   | chr7@ 58282921-58282944    |
| GGAGACCAGCTCTCTCCAGG | TGG | 4          | 5,19  | No   | chr6@ 63225175-63225198    |
| GGAGACCAGCTCTCTCCAGG | CAG | 4          | 5,19  | No   | chr6@ 129766229-129766252  |
| GGAGACCAGCTCTCTCCAGG | CAG | 4          | 5,19  | No   | chr6@ 44688564-44688587    |
| GGAGACCAGCTCTCTCCAGG | CAG | 4          | 5,19  | No   | chr5@ 126675997-126676020  |
| GGAGACCAGCTCTCTCCAGG | AAG | 4          | 5,19  | No   | chr5@ 87359227-87359250    |
| GGAGACCAGCTCTCTCCAGG | AAG | 4          | 5,19  | No   | chr5@ 87300749-87300772    |
| GGAGACCAGCTCTCTCCAGG | TGG | 4          | 5,19  | No   | chr4@ 73184232-73184255    |
| GGAGACCAGCTCTCTCCAGG | CAG | 4          | 5,19  | No   | chr3@ 56335965-56335988    |
| GGAGACCAGCTCTCTCCAGG | TGG | 4          | 5,19  | No   | chr3@ 17915223-17915246    |
| GGAGACCAGCTCTCTCCAGG | AGG | 4          | 5,19  | No   | chr3@ 58954535-58954558    |
| GGAGACCAGCTCTCTCCAGG | TGG | 4          | 5,19  | No   | chr3@ 21256459-21256482    |
| GGAGACCAGCTCTCTCCAGG | CAG | 4          | 5,19  | No   | chr3@ 10502946-10502969    |
| GGAGACCAGCTCTCTCCAGG | CAG | 4          | 5,19  | No   | chr2@ 14357004-14357027    |
| GGAGACCAGCTCTCTCCAGG | CGG | 4          | 5,19  | No   | chr2@ 139465469-139465492  |
| GGAGACCAGCTCTCTCCAGG | AAG | 4          | 5,19  | No   | chr2@ 97696308-97696331    |
| GGAGACCAGCTCTCTCCAGG | AGG | 4          | 5,19  | No   | chr2@ 78767220-78767243    |
| GGAGACCAGCTCTCTCCAGG | TGG | 4          | 5,19  | No   | chr2@ 40385442-40385465    |
| GGAGACCAGCTCTCTCCAGG | AGG | 4          | 5,19  | No   | chr2@ 3549485-3549508      |
| GGAGACCAGCTCTCTCCAGG | TGG | 4          | 5,19  | No   | chr1@ 99078626-99078649    |

| Sequence             | PAM | Similarity | Mism.   | Gene | Locus                      |
|----------------------|-----|------------|---------|------|----------------------------|
| GGAGACCAGCTCTCTCCAGG | AGG | 4          | 5,19    | No   | chr1@ 97535487-97535510    |
| GGAGACCAGCTCTCTCCAGG | AGG | 4          | 5,19    | No   | chr1@ 153344611-153344634  |
| GGAGACCAGCTCTCTCCAGG | CAG | 4          | 5,19    | No   | chr1@ 12558470-12558493    |
| GCCGGCCAGGTCTCTCCACG | GAG | 2          | 2,3,10  | No   | chr4@ 149307232-149307255  |
| TGAGCCAGCTCTCTCCACG  | AGG | 2          | 1,3,4   | No   | chr3@ 122455163-122455186  |
| GGAGGCCAGTTCTCTCCAGG | AGG | 2          | 10,19   | No   | chrX@ 20978967-20978990    |
| GGAGGCCAGTTCTCTCCAGG | AGG | 2          | 10,19   | No   | chrX@ 117739433-117739456  |
| GGAGACCAGCTCTCTCCGCG | CAG | 2          | 5,18    | No   | chr18@ 21487921-21487944   |
| GGAGACCAGCTCTCTCCTCG | TAG | 2          | 5,18    | No   | chr9@ 6834090-6834113      |
| GGAGACCAGCTCTCTCCTCG | GGG | 2          | 5,18    | No   | chr3@ 115174342-115174365  |
| GGTGTCCATCTCTCTCCACG | TGG | 2          | 3,5,9   | No   | chr3@ 32720611-32720634    |
| AGAAGTCAGCTCTCTCCACG | GAG | 2          | 1,4,6   | No   | chr2@ 162607400-162607423  |
| GGTGGCCAGATCTCTCCACA | GAG | 1          | 3,10,20 | No   | chr1@ 75651902-75651925    |
| GCAGGCCAGGTTTCTCCACG | GGG | 1          | 2,10,12 | No   | chr10@ 74973355-74973378   |
| TGAGACCAGCTCTCTCCAGG | CAG | 1          | 1,5,19  | No   | chrX@ 168984830-168984853  |
| AGAGACCAGCTCTCTCCAGG | CAG | 1          | 1,5,19  | No   | chr9@ 9367591-9367614      |
| CGAGACCAGCTCTCTCCAAG | TAG | 1          | 1,5,19  | No   | chr9@ 36156455-36156478    |
| AGAGACCAGCTCTCTCCAGG | TGG | 1          | 1,5,19  | No   | chr5@ 86223214-86223237    |
| AGAGACCAGCTCTCTCCAGG | AGG | 1          | 1,5,19  | No   | chr5@ 39209800-39209823    |
| TGAGCCCAGCTCTCTCCAGG | TGG | 1          | 1,5,19  | No   | chr3@ 128026647-128026670  |
| GGAGGCCAGCTGTCTCCAGG | CAG | 1          | 12,19   | No   | chr10@ 30324091-30324114   |
| GGAGGCCAGTTTCTCCAAG  | TGG | 1          | 12,19   | No   | chr3@ 16784007-16784030    |
| GAAGACCAGCTCTCTCCAGG | GAG | 1          | 2,5,19  | No   | chr8@ 62433436-62433459    |
| GAAGACCAGCTCTCTCCAGG | TAG | 1          | 2,5,19  | No   | chr8@ 65240531-65240554    |
| GGTGACCAGCTCTCTCCAAG | CGG | 1          | 3,5,19  | No   | chr4@ 21595857-21595880    |
| GGTGACCAGCTCTCTCCAGG | TGG | 1          | 3,5,19  | No   | chr2@ 55899886-55899909    |
| GGAAACCAGCTCTCTCCAAG | TAG | 1          | 4,5,19  | No   | chr19@ 19374333-19374356   |
| GGAAACCAGCTCTCTCCAGG | CAG | 1          | 4,5,19  | No   | chr17@ 53050344-53050367   |
| GGAAACCAGCTCTCTCCAGG | AGG | 1          | 4,5,19  | No   | chr16@ 45505898-45505921   |
| GGAAACCAGCTCTCTCCAGG | CAG | 1          | 4,5,19  | No   | chr15@ 17733445-17733468   |
| GGAAACCAGCTCTCTCCAGG | CAG | 1          | 4,5,19  | No   | chr12@ 4324463-4324486     |
| GGAGACCCGCTCTCTCCAGG | TGG | 1          | 5,8,19  | No   | chrX@ 140785952-140785975  |
| GGAGACCTGCTCTCTCCAGG | CAG | 1          | 5,8,19  | No   | chr18@ 31098351-31098374   |
| GGAGACCTGCTCTCTCCAGG | AGG | 1          | 5,8,19  | No   | chr17@ 54034089-54034112   |
| GGAGACCTGCTCTCTCCAGG | CAG | 1          | 5,8,19  | No   | chr16@ 60071452-60071475   |
| GGAGACCTGCTCTCTCCAGG | TGG | 1          | 5,8,19  | No   | chr14@ 36417759-36417782   |
| GGAGACCTGCTCTCTCCATG | CAG | 1          | 5,8,19  | No   | chr3@ 44087956-44087979    |
| GGAGGCAAGCTCTCTGCACG | TGG | 1          | 7,16    | No   | chr15@ 100587086-100587109 |
| AGAGGCCAACTCTCTCCACT | GAG | 1          | 1,9,20  | No   | chr3@ 52257491-52257514    |
| GGAGACTAGCTCTCTCCACT | GAG | 1          | 5,7,20  | No   | chr7@ 62494843-62494866    |
| GGAGACTAGCTCTCTCCACT | GAG | 1          | 5,7,20  | No   | chr4@ 25357948-25357971    |
| GGAGACTAGCTCTCTCCACT | GAG | 1          | 5,7,20  | No   | chr3@ 4114639-4114662      |
| GGAGACCAGTTCTCTCCAGG | AGG | 1          | 5,10,19 | No   | chrX@ 89780376-89780399    |



| Sequence             | PAM | Similarity | Mism.   | Gene | Locus                      |
|----------------------|-----|------------|---------|------|----------------------------|
| GGAGACCAGTTCTCTCCAGG | AAG | 1          | 5,10,19 | No   | chrX@ 46929236-46929259    |
| GGAGACCAGTTCTCTCCAGG | AGG | 1          | 5,10,19 | No   | chrX@ 109208577-109208600  |
| GGAGACCAGTTCTCTCCAGG | AAG | 1          | 5,10,19 | No   | chrX@ 115820033-115820056  |
| GGAGACCAGTTCTCTCCAAG | AGG | 1          | 5,10,19 | No   | chrX@ 137220364-137220387  |
| GGAGACCAGTTCTCTCCAGG | TGG | 1          | 5,10,19 | No   | chr19@ 9795872-9795895     |
| GGAGACCAGGTCTCTCCAGG | TGG | 1          | 5,10,19 | No   | chr18@ 16849295-16849318   |
| GGAGACCAGTTCTCTCCAGG | AGG | 1          | 5,10,19 | No   | chr18@ 58746595-58746618   |
| GGAGACCAGTTCTCTCCAGG | AGG | 1          | 5,10,19 | No   | chr18@ 33126397-33126420   |
| GGAGACCAGTTCTCTCCAGG | AGG | 1          | 5,10,19 | No   | chr18@ 37470174-37470197   |
| GGAGACCAGTTCTCTCCAGG | AGG | 1          | 5,10,19 | No   | chr18@ 81780362-81780385   |
| GGAGACCAGTTCTCTCCATG | TGG | 1          | 5,10,19 | No   | chr18@ 44163004-44163027   |
| GGAGACCAGTTCTCTCCATG | AGG | 1          | 5,10,19 | No   | chr17@ 42680247-42680270   |
| GGAGACCAGTTCTCTCCATG | AGG | 1          | 5,10,19 | No   | chr16@ 14562339-14562362   |
| GGAGACCAGTTCTCTCCAGG | AGG | 1          | 5,10,19 | No   | chr16@ 65127167-65127190   |
| GGAGACCAGTTCTCTCCAGG | AGG | 1          | 5,10,19 | No   | chr16@ 90638819-90638842   |
| GGAGACCAGTTCTCTCCAGG | AGG | 1          | 5,10,19 | No   | chr16@ 14429112-14429135   |
| GGAGACCAGTTCTCTCCAGG | AAG | 1          | 5,10,19 | No   | chr16@ 47348780-47348803   |
| GGAGACCAGTTCTCTCCAGG | AGG | 1          | 5,10,19 | No   | chr16@ 44023929-44023952   |
| GGAGACCAGGTCTCTCCAGG | CGG | 1          | 5,10,19 | No   | chr16@ 15713440-15713463   |
| GGAGACCAGTTCTCTCCAGG | AGG | 1          | 5,10,19 | No   | chr16@ 9179674-9179697     |
| GGAGACCAGTTCTCTCCAGG | AGG | 1          | 5,10,19 | No   | chr16@ 37341680-37341703   |
| GGAGACCAGTTCTCTCCAGG | AGG | 1          | 5,10,19 | No   | chr14@ 38243427-38243450   |
| GGAGACCAGATCTCTCCAGG | CAG | 1          | 5,10,19 | No   | chr14@ 13713691-13713714   |
| GGAGACCAGTTCTCTCCATG | AGG | 1          | 5,10,19 | No   | chr13@ 82547471-82547494   |
| GGAGACCAGTTCTCTCCAGG | AGG | 1          | 5,10,19 | No   | chr13@ 11252799-11252822   |
| GGAGACCAGTTCTCTCCAGG | AGG | 1          | 5,10,19 | No   | chr12@ 29504143-29504166   |
| GGAGACCAGTTCTCTCCAGG | AGG | 1          | 5,10,19 | No   | chr12@ 70463955-70463978   |
| GGAGACCAGTTCTCTCCAGG | AAG | 1          | 5,10,19 | No   | chr12@ 78629466-78629489   |
| GGAGACCAGTTCTCTCCAGG | AAG | 1          | 5,10,19 | No   | chr12@ 97573977-97574000   |
| GGAGACCAGTTCTCTCCAGG | AGG | 1          | 5,10,19 | No   | chr12@ 70381198-70381221   |
| GGAGACCAGTTCTCTCCAGG | TGG | 1          | 5,10,19 | No   | chr12@ 28264762-28264785   |
| GGAGACCAGTTCTCTCCAGG | AGG | 1          | 5,10,19 | No   | chr11@ 29437206-29437229   |
| GGAGACCAGTTCTCTCCATG | AGG | 1          | 5,10,19 | No   | chr11@ 18659856-18659879   |
| GGAGACCAGTTCTCTCCAGG | AGG | 1          | 5,10,19 | No   | chr11@ 40935581-40935604   |
| GGAGACCAGGTCTCTCCATG | AAG | 1          | 5,10,19 | No   | chr11@ 14954692-14954715   |
| GGAGACCAGTTCTCTCCAGG | AGG | 1          | 5,10,19 | No   | chr10@ 8163467-8163490     |
| GGAGACCAGTTCTCTCCAGG | AGG | 1          | 5,10,19 | No   | chr10@ 109235117-109235140 |
| GGAGACCAGTTCTCTCCAGG | TGG | 1          | 5,10,19 | No   | chr10@ 17187678-17187701   |
| GGAGACCAGTTCTCTCCAGG | AGG | 1          | 5,10,19 | No   | chr9@ 33737079-33737102    |
| GGAGACCAGTTCTCTCCAGG | AGG | 1          | 5,10,19 | No   | chr9@ 3989472-3989495      |
| GGAGACCAGTTCTCTCCAGG | AGG | 1          | 5,10,19 | No   | chr9@ 90468558-90468581    |
| GGAGACCAGTTCTCTCCAGG | AGG | 1          | 5,10,19 | No   | chr9@ 71987228-71987251    |
| GGAGACCAGTTCTCTCCAGG | AGG | 1          | 5,10,19 | No   | chr9@ 66341383-66341406    |

| Sequence             | PAM | Similarity | Mism.   | Gene | Locus                     |
|----------------------|-----|------------|---------|------|---------------------------|
| GGAGACCAGTTCTCTCCAGG | AGG | 1          | 5,10,19 | No   | chr8@ 90748768-90748791   |
| GGAGACCAGTTCTCTCCAGG | AGG | 1          | 5,10,19 | No   | chr8@ 60876292-60876315   |
| GGAGACCAGTTCTCTCCAGG | AGG | 1          | 5,10,19 | No   | chr7@ 5281841-5281864     |
| GGAGACCAGTTCTCTCCAGG | AGG | 1          | 5,10,19 | No   | chr7@ 53761800-53761823   |
| GGAGACCAGTTCTCTCCAGG | AGG | 1          | 5,10,19 | No   | chr6@ 106934863-106934886 |
| GGAGACCAGTTCTCTCCAGG | CAG | 1          | 5,10,19 | No   | chr6@ 122260887-122260910 |
| GGAGACCAGTTCTCTCCAGG | AGG | 1          | 5,10,19 | No   | chr6@ 24805249-24805272   |
| GGAGACCAGTTCTCTCCAGG | AGG | 1          | 5,10,19 | No   | chr6@ 128679312-128679335 |
| GGAGACCAGTTCTCTCCAAG | TGG | 1          | 5,10,19 | No   | chr5@ 7094456-7094479     |
| GGAGACCAGTTCTCTCCAGG | AGG | 1          | 5,10,19 | No   | chr5@ 34683225-34683248   |
| GGAGACCAGTTCTCTCCAGG | AGG | 1          | 5,10,19 | No   | chr4@ 61550975-61550998   |
| GGAGACCAGTTCTCTCCAGG | AGG | 1          | 5,10,19 | No   | chr4@ 60694051-60694074   |
| GGAGACCAGTTCTCTCCAGG | AGG | 1          | 5,10,19 | No   | chr4@ 61468936-61468959   |
| GGAGACCAGTTCTCTCCAGG | AGG | 1          | 5,10,19 | No   | chr4@ 61179393-61179416   |
| GGAGACCAGTTCTCTCCAGG | AGG | 1          | 5,10,19 | No   | chr4@ 60460594-60460617   |
| GGAGACCAGTTCTCTCCAGG | AGG | 1          | 5,10,19 | No   | chr4@ 60533326-60533349   |
| GGAGACCAGTTCTCTCCAGG | AGG | 1          | 5,10,19 | No   | chr4@ 60772707-60772730   |
| GGAGACCAGTTCTCTCCAGG | AGG | 1          | 5,10,19 | No   | chr4@ 39751087-39751110   |
| GGAGACCAGTTCTCTCCAGG | AGG | 1          | 5,10,19 | No   | chr4@ 55836534-55836557   |
| GGAGACCAGTTCTCTCCAGG | AGG | 1          | 5,10,19 | No   | chr4@ 132092626-132092649 |
| GGAGACCAGTTCTCTCCAGG | AGG | 1          | 5,10,19 | No   | chr4@ 90521707-90521730   |
| GGAGACCAGTTCTCTCCAGG | AGG | 1          | 5,10,19 | No   | chr4@ 61624987-61625010   |
| GGAGACCAGATCTCTCCAGG | AGG | 1          | 5,10,19 | No   | chr4@ 80022302-80022325   |
| GGAGACCAGTTCTCTCCAGG | AAG | 1          | 5,10,19 | No   | chr4@ 60806480-60806503   |
| GGAGACCAGTTCTCTCCAGG | AAG | 1          | 5,10,19 | No   | chr4@ 61658973-61658996   |
| GGAGACCAGTTCTCTCCAGG | AAG | 1          | 5,10,19 | No   | chr4@ 60728036-60728059   |
| GGAGACCAGTTCTCTCCAGG | AAG | 1          | 5,10,19 | No   | chr4@ 61504399-61504422   |
| GGAGACCAGTTCTCTCCAGG | AAG | 1          | 5,10,19 | No   | chr4@ 60124760-60124783   |
| GGAGACCAGTTCTCTCCAGG | AAG | 1          | 5,10,19 | No   | chr4@ 61580767-61580790   |
| GGAGACCAGTTCTCTCCAGG | AAG | 1          | 5,10,19 | No   | chr4@ 61293306-61293329   |
| GGAGACCAGTTCTCTCCAGG | AAG | 1          | 5,10,19 | No   | chr4@ 60399391-60399414   |
| GGAGACCAGTTCTCTCCAGG | AGG | 1          | 5,10,19 | No   | chr4@ 53366849-53366872   |
| GGAGACCAGTTCTCTCCAGG | CAG | 1          | 5,10,19 | No   | chr4@ 6099047-6099070     |
| GGAGACCAGTTCTCTCCAGG | AGG | 1          | 5,10,19 | No   | chr4@ 105521567-105521590 |
| GGAGACCAGTTCTCTCCAGG | TAG | 1          | 5,10,19 | No   | chr4@ 12587583-12587606   |
| GGAGACCAGTTCTCTCCAGG | AAG | 1          | 5,10,19 | No   | chr4@ 60207444-60207467   |
| GGAGACCAGTTCTCTCCAGG | AAG | 1          | 5,10,19 | No   | chr4@ 60647314-60647337   |
| GGAGACCAGTTCTCTCCAGG | AAG | 1          | 5,10,19 | No   | chr4@ 61759603-61759626   |
| GGAGACCAGTTCTCTCCAGG | AAG | 1          | 5,10,19 | No   | chr4@ 60567099-60567122   |
| GGAGACCAGTTCTCTCCAGG | AAG | 1          | 5,10,19 | No   | chr4@ 61213163-61213186   |
| GGAGACCAGATCTCTCCATG | AGG | 1          | 5,10,19 | No   | chr3@ 134151759-134151782 |
| GGAGACCAGATCTCTCCAGG | CAG | 1          | 5,10,19 | No   | chr3@ 4811857-4811880     |
| GGAGACCAGTTCTCTCCAGG | AGG | 1          | 5,10,19 | No   | chr3@ 126175718-126175741 |

| Sequence             | PAM | Similarity | Mism.   | Gene | Locus                     |
|----------------------|-----|------------|---------|------|---------------------------|
| GGAGACCAGTTCTCTCCAGG | AGG | 1          | 5,10,19 | No   | chr3@ 36305867-36305890   |
| GGAGACCAGTTCTCTCCAGG | AAG | 1          | 5,10,19 | No   | chr3@ 53782761-53782784   |
| GGAGACCAGTTCTCTCCAGG | AGG | 1          | 5,10,19 | No   | chr3@ 83824391-83824414   |
| GGAGACCAGTTCTCTCCAGG | AGG | 1          | 5,10,19 | No   | chr3@ 26868466-26868489   |
| GGAGACCAGTTCTCTCCATG | AGG | 1          | 5,10,19 | No   | chr3@ 37100399-37100422   |
| GGAGACCAGGTCTCTCCAAG | AGG | 1          | 5,10,19 | No   | chr2@ 47779375-47779398   |
| GGAGACCAGTTCTCTCCAGG | AGG | 1          | 5,10,19 | No   | chr2@ 23934305-23934328   |
| GGAGACCAGTTCTCTCCAGG | AGG | 1          | 5,10,19 | No   | chr2@ 154976368-154976391 |
| GGAGACCAGTTCTCTCCATG | AGG | 1          | 5,10,19 | No   | chr1@ 9347505-9347528     |
| GGAGACCAGTTCTCTCCAGG | AGG | 1          | 5,10,19 | No   | chr1@ 22991775-22991798   |
| GGAGACCAGTTCTCTCCAGG | AAG | 1          | 5,10,19 | No   | chr1@ 117799970-117799993 |
| GGAGACCAGTTCTCTCCAGG | AGG | 1          | 5,10,19 | No   | chr1@ 43728454-43728477   |
| GGAGACCAGTTCTCTCCAGG | AGG | 1          | 5,10,19 | No   | chr1@ 97428908-97428931   |
| GGAGACCAGTTCTCTCCAGG | AGG | 1          | 5,10,19 | No   | chr1@ 60965911-60965934   |
| GGAGACCAGTTCTCTCCAGG | AGG | 1          | 5,10,19 | No   | chr1@ 30460014-30460037   |
| GGAGACCAGTTCTCTCCAGG | AGG | 1          | 5,10,19 | No   | chr1@ 58010917-58010940   |
| GGAGACCAGTTCTCTCCAGG | AGG | 1          | 5,10,19 | No   | chr1@ 138313954-138313977 |
| GGAGACCAGTTCTCTCCAGG | AAG | 1          | 5,10,19 | No   | chr1@ 150879970-150879993 |
| GGAGACCAGTTCTCTCCAGG | AGG | 1          | 5,10,19 | No   | chr1@ 122170509-122170532 |
| GGAGACCAGTTCTCTCCATG | AAG | 1          | 5,10,19 | No   | chr1@ 5765312-5765335     |
| GGAGCACAGCTCTCTCCACT | TAG | 1          | 5,6,20  | No   | chr11@ 23851387-23851410  |
| GTAGGCAAGCTCTCTCCAAG | TAG | 1          | 2,7,19  | No   | chr9@ 110441825-110441848 |
| GGAAGCCAGCCTTCTCCACG | TAG | 1          | 4,11,12 | No   | chr3@ 9326204-9326227     |
| CGAGACCAGCTCTCTCCTCG | CAG | 1          | 1,5,18  | No   | chr4@ 75164426-75164449   |
| GGAGACTAGCTCTCTCCAGG | CGG | 1          | 5,7,19  | No   | chr17@ 80591622-80591645  |
| GGAGACAAGCTCTCTCCAGG | AAG | 1          | 5,7,19  | No   | chr17@ 38411586-38411609  |
| GGAGACTAGCTCTCTCCAGG | CAG | 1          | 5,7,19  | No   | chr13@ 83962172-83962195  |
| GGAGACTAGCTCTCTCCAGG | CAG | 1          | 5,7,19  | No   | chr12@ 74123885-74123908  |
| GGAGACTAGCTCTCTCCAGG | TGG | 1          | 5,7,19  | No   | chr12@ 65162500-65162523  |
| GGAGACTAGCTCTCTCCAGG | CAG | 1          | 5,7,19  | No   | chr10@ 53135537-53135560  |
| GGAGACTAGCTCTCTCCAGG | CAG | 1          | 5,7,19  | No   | chr6@ 14544131-14544154   |
| GGAGACTAGCTCTCTCCAGG | TGG | 1          | 5,7,19  | No   | chr1@ 3189390-3189413     |
| GAAGACCAGCTCTCTCCCG  | CAG | 1          | 2,5,18  | No   | chr7@ 12861574-12861597   |
| GGAGACCAACTCTCTCCAAG | AGG | 1          | 5,9,19  | No   | chr19@ 53593106-53593129  |
| GGAGACCATCTCTCTCCAAG | TGG | 1          | 5,9,19  | No   | chr7@ 13105394-13105417   |
| GGAGATCAGCTCTCTCCATG | TGG | 1          | 5,6,19  | No   | chr17@ 22812194-22812217  |
| GGAGAACAGCTCTCTCCAGG | CAG | 1          | 5,6,19  | No   | chr13@ 81212528-81212551  |
| GGAGATCAGCTCTCTCCAGG | CAG | 1          | 5,6,19  | No   | chr13@ 16533168-16533191  |
| GGAGAGCAGCTCTCTCCAAG | TGG | 1          | 5,6,19  | No   | chr11@ 18100814-18100837  |
| GGAGATCAGCTCTCTCCAAG | CAG | 1          | 5,6,19  | No   | chr10@ 19058379-19058402  |
| GGAGGCAAGTCTCTCCATG  | TAG | 1          | 7,10,19 | No   | chr18@ 77053921-77053944  |
| GGAGACCAGTTCTCTCCTCG | AGG | 1          | 5,10,18 | No   | chr1@ 110093686-110093709 |
| GGAGACCAGCACTCTCCAGG | TGG | 1          | 5,11,19 | No   | chrX@ 14077860-14077883   |

| Sequence              | PAM | Similarity | Mism.    | Gene | Locus                     |
|-----------------------|-----|------------|----------|------|---------------------------|
| GGAGACCAGCCCTCTCCAGG  | CAG | 1          | 5,11,19  | No   | chr17@ 57512043-57512066  |
| GGAGACCAGCCCTCTCCAAG  | AGG | 1          | 5,11,19  | No   | chr3@ 20766670-20766693   |
| GGCTGCCAGCTCTTCCAGG   | GAG | 1          | 3,4,16   | No   | chr4@ 62454367-62454390   |
| GGAGACCAGCTGTCTCCAGG  | AAG | 0          | 5,12,19  | No   | chr19@ 11437379-11437402  |
| GGAGACCAGCTTTCTCCAGG  | CAG | 0          | 5,12,19  | No   | chr15@ 5626736-5626759    |
| GGAGACCAGCTTTCTCCAGG  | TGG | 0          | 5,12,19  | No   | chr12@ 33529852-33529875  |
| GGAGACCAGCTGTCTCCAGG  | CAG | 0          | 5,12,19  | No   | chr12@ 74960697-74960720  |
| GGAGACCAGCTTTCTCCAGG  | TGG | 0          | 5,12,19  | No   | chr11@ 99975672-99975695  |
| GGAGACCAGCTGTCTCCATG  | TGG | 0          | 5,12,19  | No   | chr4@ 12209796-12209819   |
| GGAGACCAGCTATCTCCAGG  | GGG | 0          | 5,12,19  | No   | chr4@ 17397847-17397870   |
| GGAGACCAGCTGTCTCCAGG  | TGG | 0          | 5,12,19  | No   | chr3@ 9386462-9386485     |
| GGAGACCAGCTCTCTCCAGA  | AGG | 0          | 5,19,20  | No   | chr15@ 48874169-48874192  |
| GGAGACCAGCTCTCTCCAGA  | CAG | 0          | 5,19,20  | No   | chr13@ 79852067-79852090  |
| GGAGACCAGCTCTCTCCAGT  | AGG | 0          | 5,19,20  | No   | chr13@ 84143776-84143799  |
| GGAGACCAGCTCTCTCCATC  | AGG | 0          | 5,19,20  | No   | chr12@ 68842098-68842121  |
| GGAGACCAGCTCTCTCCAGA  | CAG | 0          | 5,19,20  | No   | chr11@ 19125885-19125908  |
| GGAGACCAGCTCTCTCCAGA  | CAG | 0          | 5,19,20  | No   | chr9@ 36454737-36454760   |
| GGAGACCAGCTCTCTCCAGA  | TAG | 0          | 5,19,20  | No   | chr2@ 49230167-49230190   |
| GGAGGCCAGTTTTCTCCAGG  | AGG | 0          | 10,12,19 | No   | chr9@ 8532588-8532611     |
| GGAGGCCAGTTTTCTCCAGG  | AGG | 0          | 10,12,19 | No   | chr2@ 23420508-23420531   |
| GGAGACCAGCTCTCTCTAGG  | CAG | 0          | 5,17,19  | No   | chrX@ 160751952-160751975 |
| GGAGACCAGCTCTCTCTAGG  | CAG | 0          | 5,17,19  | No   | chrX@ 158080467-158080490 |
| GGAGACCAGCTCTCTCTAAG  | CAG | 0          | 5,17,19  | No   | chr17@ 54865520-54865543  |
| GGAGACCAGCTCTCTCAAGG  | TGG | 0          | 5,17,19  | No   | chr3@ 72132813-72132836   |
| GGAGACCAGCTCTCTCTAGG  | TAG | 0          | 5,17,19  | No   | chr2@ 39633461-39633484   |
| GGAGACCAGCTCTCTCTAGG  | TGG | 0          | 5,17,19  | No   | chr1@ 113834491-113834514 |
| GGAGACCAGCTCTCTCTAGG  | CAG | 0          | 5,17,19  | No   | chr1@ 99175859-99175882   |
| GGAGTCCAACCTCTCTCCTCG | TGG | 0          | 5,9,18   | No   | chr17@ 91345646-91345669  |
| GGAGGCCAGCTCTCTCCTTG  | CAG | 0          | 18,19    | No   | chr13@ 14917332-14917355  |
| GGAGGCCAGCTCTCTCCTGG  | TGG | 0          | 18,19    | No   | chr10@ 31368600-31368623  |
| GGAGGCCAGCTCTCTCCCAG  | CAG | 0          | 18,19    | No   | chr5@ 26713413-26713436   |
| GGAGGCCAGCTCTCTCCTGG  | TGG | 0          | 18,19    | No   | chr2@ 55374134-55374157   |
| GGAGGCCAGCTCTCTCCTGG  | TGG | 0          | 18,19    | No   | chr2@ 61433597-61433620   |
| GGAGGCCAGCTCTCTCCCAG  | TGG | 0          | 18,19    | No   | chr1@ 5630490-5630513     |
| GGAGGCCAGTTCTCTCTAGG  | AGG | 0          | 10,17,19 | No   | chr1@ 121985410-121985433 |
| GGAGACCAGCTCTCCCCAGG  | AAG | 0          | 5,15,19  | No   | chr11@ 10737105-10737128  |
| GGAGACCAGCTCTCCCCAAG  | CAG | 0          | 5,15,19  | No   | chr9@ 3667331-3667354     |
| GGAGACCAGCTCTCTCCTCT  | GAG | 0          | 5,18,20  | No   | chrX@ 40027631-40027654   |
| GGAGACCAGCTCTCTCCTCT  | GAG | 0          | 5,18,20  | No   | chrX@ 24373068-24373091   |
| GGAGACCAGCTCTCTCCTCA  | TAG | 0          | 5,18,20  | No   | chr18@ 22076380-22076403  |
| GGAGACCAGCTCTCTCCTCT  | GAG | 0          | 5,18,20  | No   | chr17@ 41676952-41676975  |
| GGAGACCAGCTCTCTCCCCA  | GGG | 0          | 5,18,20  | No   | chr16@ 20186114-20186137  |
| GGAGACCAGCTCTCTCCTCT  | GAG | 0          | 5,18,20  | No   | chr15@ 57292172-57292195  |

| Sequence             | PAM | Similarity | Mism.    | Gene | Locus                      |
|----------------------|-----|------------|----------|------|----------------------------|
| GGAGACCAGCTCTCTCCTCT | GAG | 0          | 5,18,20  | No   | chr14@ 52503564-52503587   |
| GGAGACCAGCTCTCTCCTCT | GAG | 0          | 5,18,20  | No   | chr7@ 68625448-68625471    |
| GGAGACCAGCTCTCTCCTCT | GAG | 0          | 5,18,20  | No   | chr6@ 61482264-61482287    |
| GGAGACCAGCTCTCTCCTCT | GAG | 0          | 5,18,20  | No   | chr5@ 14552258-14552281    |
| GGAGACCAGCTCTCTCCTCA | TGG | 0          | 5,18,20  | No   | chr5@ 5919297-5919320      |
| GGAGACCAGCTCTCTCCTCT | GAG | 0          | 5,18,20  | No   | chr4@ 29359308-29359331    |
| GGAGACCAGCTCTCTCCTCT | GAG | 0          | 5,18,20  | No   | chr4@ 13680420-13680443    |
| GGAGACCAGCTCTCTCCTCT | GAG | 0          | 5,18,20  | No   | chr4@ 4170753-4170776      |
| GGAGACCAGCTCTCTCCTCT | GAG | 0          | 5,18,20  | No   | chr3@ 41786597-41786620    |
| GGAGACCAGCTCTCTCCTCT | GAG | 0          | 5,18,20  | No   | chr2@ 10952649-10952672    |
| GGAGACCAGCTCTCTCCTCT | GAG | 0          | 5,18,20  | No   | chr2@ 5275979-5276002      |
| GGAGACCAGCTCTCTCCTCT | GAG | 0          | 5,18,20  | No   | chr1@ 107233146-107233169  |
| GGAGGCTAGCTGTCAACACG | GGG | 0          | 7,12,15  | No   | chr19@ 32726447-32726470   |
| GGAGACCAGCTCACTCCCCG | TGG | 0          | 5,13,18  | No   | chr16@ 15921746-15921769   |
| AGAGGCCAGCTCTCTCCTGG | TGG | 0          | 1,18,19  | No   | chrX@ 38840120-38840143    |
| TGAGGCCAGCTCTCTCCTAG | CAG | 0          | 1,18,19  | No   | chr14@ 107171340-107171363 |
| GGAAGCCAGCTCTCTCCTGG | CAG | 0          | 4,18,19  | No   | chrX@ 110974290-110974313  |
| GGAAGCCAGCTCTCTCCAG  | TGG | 0          | 4,18,19  | No   | chr18@ 39169211-39169234   |
| GGAAGCCAGCTCTCTCCTGG | CAG | 0          | 4,18,19  | No   | chr17@ 43290143-43290166   |
| GGAGGCCAGCCCTCTCCAGA | GGG | 0          | 11,19,20 | No   | chr17@ 84860919-84860942   |
| GGAGGCCAGCACTCTCCAAA | CAG | 0          | 11,19,20 | No   | chr17@ 52668262-52668285   |
| GGAGACCAGCTCTCTCCAG  | CAG | 0          | 5,18,19  | No   | chrX@ 104515425-104515448  |
| GGAGACCAGCTCTCTCCAG  | TGG | 0          | 5,18,19  | No   | chrX@ 103048235-103048258  |
| GGAGACCAGCTCTCTCCAG  | TGG | 0          | 5,18,19  | No   | chrX@ 71508862-71508885    |
| GGAGACCAGCTCTCTCCTGG | TGG | 0          | 5,18,19  | No   | chrX@ 23627853-23627876    |
| GGAGACCAGCTCTCTCCTGG | TAG | 0          | 5,18,19  | No   | chrX@ 74587633-74587656    |
| GGAGACCAGCTCTCTCCTGG | CAG | 0          | 5,18,19  | No   | chrX@ 144056104-144056127  |
| GGAGACCAGCTCTCTCCTGG | TAG | 0          | 5,18,19  | No   | chrX@ 14091184-14091207    |
| GGAGACCAGCTCTCTCCTGG | TAG | 0          | 5,18,19  | No   | chrX@ 38839937-38839960    |
| GGAGACCAGCTCTCTCCTGG | TAG | 0          | 5,18,19  | No   | chrX@ 91073603-91073626    |
| GGAGACCAGCTCTCTCCAG  | CAG | 0          | 5,18,19  | No   | chrX@ 9084458-9084481      |
| GGAGACCAGCTCTCTCCAG  | CAG | 0          | 5,18,19  | No   | chrX@ 9188246-9188269      |
| GGAGACCAGCTCTCTCCTGG | TGG | 0          | 5,18,19  | No   | chrX@ 21040643-21040666    |
| GGAGACCAGCTCTCTCCTGG | AAG | 0          | 5,18,19  | No   | chrX@ 59995959-59995982    |
| GGAGACCAGCTCTCTCCTGG | CAG | 0          | 5,18,19  | No   | chrX@ 80309561-80309584    |
| GGAGACCAGCTCTCTCCTGG | CAG | 0          | 5,18,19  | No   | chrX@ 163972341-163972364  |
| GGAGACCAGCTCTCTCCTGG | CAG | 0          | 5,18,19  | No   | chrX@ 14034755-14034778    |
| GGAGACCAGCTCTCTCCAG  | TGG | 0          | 5,18,19  | No   | chr19@ 9796080-9796103     |
| GGAGACCAGCTCTCTCCAG  | TGG | 0          | 5,18,19  | No   | chr19@ 16788887-16788910   |
| GGAGACCAGCTCTCTCCAG  | CAG | 0          | 5,18,19  | No   | chr19@ 39077722-39077745   |
| GGAGACCAGCTCTCTCCTGG | AAG | 0          | 5,18,19  | No   | chr19@ 43008509-43008532   |
| GGAGACCAGCTCTCTCCTGG | TGG | 0          | 5,18,19  | No   | chr19@ 54985811-54985834   |
| GGAGACCAGCTCTCTCCTGG | CAG | 0          | 5,18,19  | No   | chr19@ 26329904-26329927   |

| Sequence             | PAM | Similarity | Mism.   | Gene | Locus                      |
|----------------------|-----|------------|---------|------|----------------------------|
| GGAGACCAGCTCTCTCCTGG | CAG | 0          | 5,18,19 | No   | chr19@ 38210039-38210062   |
| GGAGACCAGCTCTCTCCTGG | TGG | 0          | 5,18,19 | No   | chr19@ 11677996-11678019   |
| GGAGACCAGCTCTCTCCCGG | AGG | 0          | 5,18,19 | No   | chr18@ 14959871-14959894   |
| GGAGACCAGCTCTCTCCCTG | TGG | 0          | 5,18,19 | No   | chr18@ 14454726-14454749   |
| GGAGACCAGCTCTCTCCTAG | CAG | 0          | 5,18,19 | No   | chr18@ 33421439-33421462   |
| GGAGACCAGCTCTCTCCTGG | CAG | 0          | 5,18,19 | No   | chr18@ 9757563-9757586     |
| GGAGACCAGCTCTCTCCTGG | TGG | 0          | 5,18,19 | No   | chr18@ 47894092-47894115   |
| GGAGACCAGCTCTCTCCTGG | TGG | 0          | 5,18,19 | No   | chr18@ 79613577-79613600   |
| GGAGACCAGCTCTCTCCTGG | CGG | 0          | 5,18,19 | No   | chr18@ 31366516-31366539   |
| GGAGACCAGCTCTCTCCTGG | TGG | 0          | 5,18,19 | No   | chr18@ 52080842-52080865   |
| GGAGACCAGCTCTCTCCCGG | TGG | 0          | 5,18,19 | No   | chr18@ 22074653-22074676   |
| GGAGACCAGCTCTCTCCTGG | CAG | 0          | 5,18,19 | No   | chr18@ 32751081-32751104   |
| GGAGACCAGCTCTCTCCTAG | TAG | 0          | 5,18,19 | No   | chr18@ 29816557-29816580   |
| GGAGTCCAGCTCTCTCCTGG | AAG | 0          | 5,18,19 | No   | chr17@ 40547764-40547787   |
| GGAGACCAGCTCTCTCCGGG | CAG | 0          | 5,18,19 | No   | chr17@ 58791251-58791274   |
| GGAGACCAGCTCTCTCCTGG | TGG | 0          | 5,18,19 | No   | chr17@ 76094199-76094222   |
| GGAGACCAGCTCTCTCCTGG | TGG | 0          | 5,18,19 | No   | chr17@ 58077996-58078019   |
| GGAGACCAGCTCTCTCCTGG | TGG | 0          | 5,18,19 | No   | chr17@ 77530647-77530670   |
| GGAGACCAGCTCTCTCCAG  | CAG | 0          | 5,18,19 | No   | chr17@ 72728423-72728446   |
| GGAGACCAGCTCTCTCCCGG | TGG | 0          | 5,18,19 | No   | chr17@ 42680429-42680452   |
| GGAGACCAGCTCTCTCCCTG | TGG | 0          | 5,18,19 | No   | chr17@ 54154235-54154258   |
| GGAGACCAGCTCTCTCCTGG | TGG | 0          | 5,18,19 | No   | chr17@ 89102858-89102881   |
| GGAGACCAGCTCTCTCCTGG | CAG | 0          | 5,18,19 | No   | chr17@ 89585731-89585754   |
| GGAGACCAGCTCTCTCCTGG | CAG | 0          | 5,18,19 | No   | chr17@ 42969878-42969901   |
| GGAGACCAGCTCTCTCCTGG | TGG | 0          | 5,18,19 | No   | chr17@ 57465796-57465819   |
| GGAGACCAGCTCTCTCCAG  | CGG | 0          | 5,18,19 | No   | chr16@ 17545081-17545104   |
| GGAGACCAGCTCTCTCCCGG | CAG | 0          | 5,18,19 | No   | chr16@ 87624071-87624094   |
| GGAGACCAGCTCTCTCCTGG | CAG | 0          | 5,18,19 | No   | chr16@ 13166089-13166112   |
| GGAGACCAGCTCTCTCCTGG | AAG | 0          | 5,18,19 | No   | chr16@ 61676043-61676066   |
| GGAGCCCAGCTCTCTCCAG  | CAG | 0          | 5,18,19 | No   | chr16@ 36155002-36155025   |
| GGAGTCCAGCTCTCTCCTGG | TGG | 0          | 5,18,19 | No   | chr16@ 71751401-71751424   |
| GGAGACCAGCTCTCTCCAG  | TGG | 0          | 5,18,19 | No   | chr16@ 4245235-4245258     |
| GGAGACCAGCTCTCTCCTGG | TGG | 0          | 5,18,19 | No   | chr16@ 19709938-19709961   |
| GGAGACCAGCTCTCTCCTGG | TGG | 0          | 5,18,19 | No   | chr16@ 19709733-19709756   |
| GGAGACCAGCTCTCTCCTGG | TGG | 0          | 5,18,19 | No   | chr16@ 59858686-59858709   |
| GGAGACCAGCTCTCTCCTGG | AGG | 0          | 5,18,19 | No   | chr16@ 11830651-11830674   |
| GGAGACCAGCTCTCTCCTGG | AGG | 0          | 5,18,19 | No   | chr16@ 51317554-51317577   |
| GGAGACCAGCTCTCTCCTGG | TGG | 0          | 5,18,19 | No   | chr15@ 60358105-60358128   |
| GGAGACCAGCTCTCTCCAG  | CAG | 0          | 5,18,19 | No   | chr15@ 63179724-63179747   |
| GGAGACCAGCTCTCTCCTGG | CAG | 0          | 5,18,19 | No   | chr15@ 43239421-43239444   |
| GGAGACCAGCTCTCTCCTGG | CGG | 0          | 5,18,19 | No   | chr15@ 56899363-56899386   |
| GGAGCCCAGCTCTCTCCTGG | CAG | 0          | 5,18,19 | No   | chr14@ 13759070-13759093   |
| GGAGACCAGCTCTCTCCCGG | CAG | 0          | 5,18,19 | No   | chr14@ 105188615-105188638 |

| Sequence             | PAM | Similarity | Mism.   | Gene | Locus                      |
|----------------------|-----|------------|---------|------|----------------------------|
| GGAGACCAGCTCTCTCCTGG | CAG | 0          | 5,18,19 | No   | chr14@ 49274648-49274671   |
| GGAGACCAGCTCTCTCCTGG | TGG | 0          | 5,18,19 | No   | chr14@ 14946074-14946097   |
| GGAGACCAGCTCTCTCCTGG | TGG | 0          | 5,18,19 | No   | chr14@ 9012954-9012977     |
| GGAGACCAGCTCTCTCCCGG | TGG | 0          | 5,18,19 | No   | chr14@ 74433982-74434005   |
| GGAGACCAGCTCTCTCCTGG | CAG | 0          | 5,18,19 | No   | chr14@ 49056214-49056237   |
| GGAGACCAGCTCTCTCCTGG | CAG | 0          | 5,18,19 | No   | chr14@ 44998018-44998041   |
| GGAGACCAGCTCTCTCCTGG | CAG | 0          | 5,18,19 | No   | chr14@ 107872839-107872862 |
| GGAGACCAGCTCTCTCCTGG | GAG | 0          | 5,18,19 | No   | chr14@ 102769968-102769991 |
| GGAGACCAGCTCTCTCCAG  | TGG | 0          | 5,18,19 | No   | chr13@ 80762993-80763016   |
| GGAGACCAGCTCTCTCCCTG | CAG | 0          | 5,18,19 | No   | chr13@ 93210132-93210155   |
| GGAGACCAGCTCTCTCCTAG | TGG | 0          | 5,18,19 | No   | chr13@ 120060909-120060932 |
| GGAGACCAGCTCTCTCCTGG | CAG | 0          | 5,18,19 | No   | chr13@ 86521584-86521607   |
| GGAGACCAGCTCTCTCCTGG | CAG | 0          | 5,18,19 | No   | chr13@ 81033228-81033251   |
| GGAGACCAGCTCTCTCCTGG | TGG | 0          | 5,18,19 | No   | chr13@ 14339540-14339563   |
| GGAGACCAGCTCTCTCCTGG | CAG | 0          | 5,18,19 | No   | chr13@ 60281984-60282007   |
| GGAGACCAGCTCTCTCCTGG | TGG | 0          | 5,18,19 | No   | chr13@ 106329054-106329077 |
| GGAGACCAGCTCTCTCCTGG | TGG | 0          | 5,18,19 | No   | chr13@ 114414967-114414990 |
| GGAGACCAGCTCTCTCCTGG | TGG | 0          | 5,18,19 | No   | chr13@ 89484920-89484943   |
| GGAGACCAGCTCTCTCCTGG | TGG | 0          | 5,18,19 | No   | chr13@ 108590200-108590223 |
| GGAGACCAGCTCTCTCCTGG | TGG | 0          | 5,18,19 | No   | chr13@ 17265821-17265844   |
| GGAGTCCAGCTCTCTCCTGG | TGG | 0          | 5,18,19 | No   | chr13@ 84830187-84830210   |
| GGAGACCAGCTCTCTCCAG  | TGG | 0          | 5,18,19 | No   | chr13@ 9028250-9028273     |
| GGAGACCAGCTCTCTCCAG  | TAG | 0          | 5,18,19 | No   | chr13@ 85382609-85382632   |
| GGAGACCAGCTCTCTCCTGG | CAG | 0          | 5,18,19 | No   | chr13@ 91065115-91065138   |
| GGAGACCAGCTCTCTCCTGG | TGG | 0          | 5,18,19 | No   | chr13@ 86783473-86783496   |
| GGAGACCAGCTCTCTCCTGG | CAG | 0          | 5,18,19 | No   | chr13@ 21051031-21051054   |
| GGAGACCAGCTCTCTCCTGG | CAG | 0          | 5,18,19 | No   | chr13@ 94333638-94333661   |
| GGAGACCAGCTCTCTCCTGG | CAG | 0          | 5,18,19 | No   | chr13@ 4490893-4490916     |
| GGAGACCAGCTCTCTCCTGG | TGG | 0          | 5,18,19 | No   | chr13@ 92932642-92932665   |
| GGAGACCAGCTCTCTCCTGG | TGG | 0          | 5,18,19 | No   | chr13@ 14238828-14238851   |
| GGAGACCAGCTCTCTCCTAG | TGG | 0          | 5,18,19 | No   | chr13@ 120001597-120001620 |
| GGAGACCAGCTCTCTCCAG  | TGG | 0          | 5,18,19 | No   | chr12@ 60554402-60554425   |
| GGAGACCAGCTCTCTCCAG  | CGG | 0          | 5,18,19 | No   | chr12@ 87011167-87011190   |
| GGAGACCAGCTCTCTCCAG  | CAG | 0          | 5,18,19 | No   | chr12@ 68852804-68852827   |
| GGAGACCAGCTCTCTCCTGG | CGG | 0          | 5,18,19 | No   | chr12@ 112220163-112220186 |
| GGAGACCAGCTCTCTCCTAG | TGG | 0          | 5,18,19 | No   | chr12@ 109304260-109304283 |
| GGAGACCAGCTCTCTCCTAG | TGG | 0          | 5,18,19 | No   | chr12@ 6546967-6546990     |
| GGAGACCAGCTCTCTCCTGG | CAG | 0          | 5,18,19 | No   | chr12@ 49255319-49255342   |
| GGAGACCAGCTCTCTCCTGG | TGG | 0          | 5,18,19 | No   | chr12@ 48881604-48881627   |
| GGAGACCAGCTCTCTCCAG  | CGG | 0          | 5,18,19 | No   | chr12@ 81492539-81492562   |
| GGAGACCAGCTCTCTCCCGG | TGG | 0          | 5,18,19 | No   | chr12@ 110412122-110412145 |
| GGAGACCAGCTCTCTCCTGG | TGG | 0          | 5,18,19 | No   | chr11@ 105742772-105742795 |
| GGAGACCAGCTCTCTCCTGG | CAG | 0          | 5,18,19 | No   | chr11@ 24385014-24385037   |

| Sequence             | PAM | Similarity | Mism.   | Gene | Locus                      |
|----------------------|-----|------------|---------|------|----------------------------|
| GGAGACCAGCTCTCTCCTGG | TGG | 0          | 5,18,19 | No   | chr11@ 52991934-52991957   |
| GGAGACCAGCTCTCTCCTGG | CAG | 0          | 5,18,19 | No   | chr11@ 73916517-73916540   |
| GGAGACCAGCTCTCTCCTGG | CGG | 0          | 5,18,19 | No   | chr11@ 40482636-40482659   |
| GGAGACCAGCTCTCTCCAG  | CGG | 0          | 5,18,19 | No   | chr11@ 11919992-11920015   |
| GGAGACCAGCTCTCTCCTGG | AGG | 0          | 5,18,19 | No   | chr11@ 30637254-30637277   |
| GGAGACCAGCTCTCTCCTGG | CAG | 0          | 5,18,19 | No   | chr11@ 21620283-21620306   |
| GGAGACCAGCTCTCTCCTGG | CAG | 0          | 5,18,19 | No   | chr11@ 48573325-48573348   |
| GGAGACCAGCTCTCTCCTGG | AGG | 0          | 5,18,19 | No   | chr11@ 45601924-45601947   |
| GGAGACCAGCTCTCTCCTGG | CAG | 0          | 5,18,19 | No   | chr11@ 25552563-25552586   |
| GGAGACCAGCTCTCTCCAG  | TGG | 0          | 5,18,19 | No   | chr10@ 30563628-30563651   |
| GGAGACCAGCTCTCTCCAG  | CAG | 0          | 5,18,19 | No   | chr10@ 19305515-19305538   |
| GGAGACCAGCTCTCTCCAG  | TGG | 0          | 5,18,19 | No   | chr10@ 26225496-26225519   |
| GGAGACCAGCTCTCTCCTAG | CAG | 0          | 5,18,19 | No   | chr10@ 8034987-8035010     |
| GGAGACCAGCTCTCTCCTAG | TGG | 0          | 5,18,19 | No   | chr10@ 127771021-127771044 |
| GGAGACCAGCTCTCTCCTGG | TGG | 0          | 5,18,19 | No   | chr10@ 56169208-56169231   |
| GGAGACCAGCTCTCTCCTGG | GAG | 0          | 5,18,19 | No   | chr10@ 55096285-55096308   |
| GGAGACCAGCTCTCTCCTGG | TGG | 0          | 5,18,19 | No   | chr10@ 51052589-51052612   |
| GGAGACCAGCTCTCTCCTGG | TGG | 0          | 5,18,19 | No   | chr10@ 49693974-49693997   |
| GGAGACCAGCTCTCTCCTGG | CGG | 0          | 5,18,19 | No   | chr10@ 82720684-82720707   |
| GGAGACCAGCTCTCTCCTGG | CAG | 0          | 5,18,19 | No   | chr10@ 63251657-63251680   |
| GGAGACCAGCTCTCTCCTGG | CGG | 0          | 5,18,19 | No   | chr10@ 117271696-117271719 |
| GGAGACCAGCTCTCTCCTGG | CAG | 0          | 5,18,19 | No   | chr10@ 78610709-78610732   |
| GGAGACCAGCTCTCTCCTGG | CAG | 0          | 5,18,19 | No   | chr10@ 55481652-55481675   |
| GGAGACCAGCTCTCTCCCTG | CAG | 0          | 5,18,19 | No   | chr10@ 30592781-30592804   |
| GGAGACCAGCTCTCTCCAG  | CGG | 0          | 5,18,19 | No   | chr10@ 7876700-7876723     |
| GGAGACCAGCTCTCTCCTGG | CAG | 0          | 5,18,19 | No   | chr10@ 26623290-26623313   |
| GGAGACCAGCTCTCTCCTGG | TGG | 0          | 5,18,19 | No   | chr10@ 24425673-24425696   |
| GGAGACCAGCTCTCTCCTGG | TGG | 0          | 5,18,19 | No   | chr10@ 57098538-57098561   |
| GGAGACCAGCTCTCTCCTGG | GAG | 0          | 5,18,19 | No   | chr10@ 78766359-78766382   |
| GGAGACCAGCTCTCTCCTGG | TGG | 0          | 5,18,19 | No   | chr10@ 40611736-40611759   |
| GGAGACCAGCTCTCTCCTGG | AGG | 0          | 5,18,19 | No   | chr10@ 34422816-34422839   |
| GGAGACCAGCTCTCTCCTGG | TGG | 0          | 5,18,19 | No   | chr10@ 35817723-35817746   |
| GGAGTCCAGCTCTCTCCTGG | TGG | 0          | 5,18,19 | No   | chr10@ 53183548-53183571   |
| GGAGACCAGCTCTCTCCCTG | TGG | 0          | 5,18,19 | No   | chr9@ 89249417-89249440    |
| GGAGACCAGCTCTCTCCTTG | TGG | 0          | 5,18,19 | No   | chr9@ 87295227-87295250    |
| GGAGACCAGCTCTCTCCTGG | TGG | 0          | 5,18,19 | No   | chr9@ 84211635-84211658    |
| GGAGACCAGCTCTCTCCTGG | CAG | 0          | 5,18,19 | No   | chr9@ 118277981-118278004  |
| GGAGTCCAGCTCTCTCCTGG | TGG | 0          | 5,18,19 | No   | chr9@ 84213510-84213533    |
| GGAGACCAGCTCTCTCCAG  | CAG | 0          | 5,18,19 | No   | chr9@ 9549923-9549946      |
| GGAGACCAGCTCTCTCCGG  | TGG | 0          | 5,18,19 | No   | chr9@ 9550142-9550165      |
| GGAGACCAGCTCTCTCCGG  | TGG | 0          | 5,18,19 | No   | chr9@ 18367663-18367686    |
| GGAGACCAGCTCTCTCCTTG | CAG | 0          | 5,18,19 | No   | chr9@ 18057331-18057354    |
| GGAGACCAGCTCTCTCCTGG | CAG | 0          | 5,18,19 | No   | chr9@ 83912650-83912673    |



| Sequence             | PAM | Similarity | Mism.   | Gene | Locus                     |
|----------------------|-----|------------|---------|------|---------------------------|
| GGAGACCAGCTCTCTCCTGG | CAG | 0          | 5,18,19 | No   | chr9@ 71987023-71987046   |
| GGAGACCAGCTCTCTCCTGG | CAG | 0          | 5,18,19 | No   | chr9@ 5504810-5504833     |
| GGAGTCCAGCTCTCTCCTGG | CAG | 0          | 5,18,19 | No   | chr8@ 79102629-79102652   |
| GGAGACCAGCTCTCTCCAG  | TGG | 0          | 5,18,19 | No   | chr8@ 63402446-63402469   |
| GGAGACCAGCTCTCTCCTGG | CAG | 0          | 5,18,19 | No   | chr8@ 82606210-82606233   |
| GGAGACCAGCTCTCTCCTGG | CAG | 0          | 5,18,19 | No   | chr8@ 99140150-99140173   |
| GGAGACCAGCTCTCTCCTGG | TGG | 0          | 5,18,19 | No   | chr8@ 79814061-79814084   |
| GGAGACCAGCTCTCTCCTGG | TGG | 0          | 5,18,19 | No   | chr8@ 129130234-129130257 |
| GGAGACCAGCTCTCTCCTGG | CAG | 0          | 5,18,19 | No   | chr8@ 112526570-112526593 |
| GGAGACCAGCTCTCTCCTGG | TAG | 0          | 5,18,19 | No   | chr8@ 24854972-24854995   |
| GGAGACCAGCTCTCTCCAG  | TGG | 0          | 5,18,19 | No   | chr8@ 68713948-68713971   |
| GGAGCCCAGCTCTCTCCCGG | AGG | 0          | 5,18,19 | No   | chr7@ 74986073-74986096   |
| GGAGACCAGCTCTCTCCAG  | CAG | 0          | 5,18,19 | No   | chr7@ 137695058-137695081 |
| GGAGACCAGCTCTCTCCAG  | TGG | 0          | 5,18,19 | No   | chr7@ 108657955-108657978 |
| GGAGACCAGCTCTCTCCTAG | TGG | 0          | 5,18,19 | No   | chr7@ 24095846-24095869   |
| GGAGACCAGCTCTCTCCTGG | CGG | 0          | 5,18,19 | No   | chr7@ 18837862-18837885   |
| GGAGACCAGCTCTCTCCTGG | CAG | 0          | 5,18,19 | No   | chr7@ 120613658-120613681 |
| GGAGACCAGCTCTCTCCAG  | CAG | 0          | 5,18,19 | No   | chr7@ 123599964-123599987 |
| GGAGACCAGCTCTCTCCTGG | TGG | 0          | 5,18,19 | No   | chr7@ 26034252-26034275   |
| GGAGACCAGCTCTCTCCTGG | CGG | 0          | 5,18,19 | No   | chr7@ 36583380-36583403   |
| GGAGACCAGCTCTCTCCTGG | TGG | 0          | 5,18,19 | No   | chr7@ 103632109-103632132 |
| GGAGACCAGCTCTCTCCTGG | TGG | 0          | 5,18,19 | No   | chr7@ 8537273-8537296     |
| GGAGACCAGCTCTCTCCTGG | TGG | 0          | 5,18,19 | No   | chr7@ 9277276-9277299     |
| GGAGACCAGCTCTCTCCTGG | TGG | 0          | 5,18,19 | No   | chr7@ 7737689-7737712     |
| GGAGACCAGCTCTCTCCTGG | TGG | 0          | 5,18,19 | No   | chr7@ 26153959-26153982   |
| GGAGACCAGCTCTCTCCAG  | CAG | 0          | 5,18,19 | No   | chr6@ 43598617-43598640   |
| GGAGACCAGCTCTCTCCTGG | CAG | 0          | 5,18,19 | No   | chr6@ 104004073-104004096 |
| GGAGACCAGCTCTCTCCTGG | TAG | 0          | 5,18,19 | No   | chr6@ 73895275-73895298   |
| GGAGACCAGCTCTCTCCTGG | CGG | 0          | 5,18,19 | No   | chr6@ 43720895-43720918   |
| GGAGACCAGCTCTCTCCTGG | CAG | 0          | 5,18,19 | No   | chr6@ 57683611-57683634   |
| GGAGACCAGCTCTCTCCTGG | TGG | 0          | 5,18,19 | No   | chr6@ 73515541-73515564   |
| GGAGACCAGCTCTCTCCTGG | TGG | 0          | 5,18,19 | No   | chr6@ 59232325-59232348   |
| GGAGACCAGCTCTCTCCTGG | AAG | 0          | 5,18,19 | No   | chr6@ 111481497-111481520 |
| GGAGTCCAGCTCTCTCCTGG | TGG | 0          | 5,18,19 | No   | chr6@ 146088805-146088828 |
| GGAGACCAGCTCTCTCCAG  | CAG | 0          | 5,18,19 | No   | chr6@ 118543519-118543542 |
| GGAGACCAGCTCTCTCCCGG | TGG | 0          | 5,18,19 | No   | chr6@ 42232932-42232955   |
| GGAGACCAGCTCTCTCCTGG | GGG | 0          | 5,18,19 | No   | chr6@ 16240467-16240490   |
| GGAGACCAGCTCTCTCCTGG | TGG | 0          | 5,18,19 | No   | chr6@ 75992631-75992654   |
| GGAGACCAGCTCTCTCCTGG | AGG | 0          | 5,18,19 | No   | chr6@ 142244747-142244770 |
| GGAGACCAGCTCTCTCCTGG | CGG | 0          | 5,18,19 | No   | chr6@ 76394312-76394335   |
| GGAGACCAGCTCTCTCCTGG | TGG | 0          | 5,18,19 | No   | chr6@ 58371848-58371871   |
| GGAGACCAGCTCTCTCCTGG | TGG | 0          | 5,18,19 | No   | chr6@ 57889905-57889928   |
| GGAGACCAGCTCTCTCCTGG | TGG | 0          | 5,18,19 | No   | chr6@ 80583348-80583371   |

| Sequence             | PAM | Similarity | Mism.   | Gene | Locus                     |
|----------------------|-----|------------|---------|------|---------------------------|
| GGAGACCAGCTCTCTCCTGG | TGG | 0          | 5,18,19 | No   | chr6@ 115113868-115113891 |
| GGAGACCAGCTCTCTCCTGG | CAG | 0          | 5,18,19 | No   | chr5@ 27536100-27536123   |
| GGAGACCAGCTCTCTCCTGG | CGG | 0          | 5,18,19 | No   | chr5@ 50813566-50813589   |
| GGAGACCAGCTCTCTCCTGG | CAG | 0          | 5,18,19 | No   | chr5@ 20505322-20505345   |
| GGAGACCAGCTCTCTCCTGG | TGG | 0          | 5,18,19 | No   | chr5@ 23157131-23157154   |
| GGAGACCAGCTCTCTCCTGG | TAG | 0          | 5,18,19 | No   | chr5@ 29539189-29539212   |
| GGAGACCAGCTCTCTCCTGG | TGG | 0          | 5,18,19 | No   | chr5@ 108913327-108913350 |
| GGAGACCAGCTCTCTCCTGG | CGG | 0          | 5,18,19 | No   | chr5@ 108262499-108262522 |
| GGAGACCAGCTCTCTCCTGG | TGG | 0          | 5,18,19 | No   | chr5@ 33172393-33172416   |
| GGAGACCAGCTCTCTCCTGG | TGG | 0          | 5,18,19 | No   | chr5@ 9789863-9789886     |
| GGAGACCAGCTCTCTCCAG  | CAG | 0          | 5,18,19 | No   | chr5@ 25031958-25031981   |
| GGAGTCCAGCTCTCTCCTGG | TGG | 0          | 5,18,19 | No   | chr4@ 89497448-89497471   |
| GGAGACCAGCTCTCTCCTGG | CAG | 0          | 5,18,19 | No   | chr4@ 69562796-69562819   |
| GGAGACCAGCTCTCTCCTGG | AGG | 0          | 5,18,19 | No   | chr4@ 95044939-95044962   |
| GGAGACCAGCTCTCTCCTGG | TAG | 0          | 5,18,19 | No   | chr4@ 72992283-72992306   |
| GGAGACCAGCTCTCTCCTGG | CAG | 0          | 5,18,19 | No   | chr4@ 99043147-99043170   |
| GGAGACCAGCTCTCTCCTGG | CAG | 0          | 5,18,19 | No   | chr4@ 111998568-111998591 |
| GGAGCCCAGCTCTCTCCTGG | AGG | 0          | 5,18,19 | No   | chr4@ 17381303-17381326   |
| GGAGACCAGCTCTCTCCAG  | TGG | 0          | 5,18,19 | No   | chr4@ 72994090-72994113   |
| GGAGACCAGCTCTCTCCAG  | CGG | 0          | 5,18,19 | No   | chr4@ 13071651-13071674   |
| GGAGACCAGCTCTCTCCAG  | CAG | 0          | 5,18,19 | No   | chr4@ 9164593-9164616     |
| GGAGACCAGCTCTCTCCGG  | TGG | 0          | 5,18,19 | No   | chr4@ 108645046-108645069 |
| GGAGACCAGCTCTCTCCTGG | CAG | 0          | 5,18,19 | No   | chr4@ 61861904-61861927   |
| GGAGACCAGCTCTCTCCTGG | CAG | 0          | 5,18,19 | No   | chr4@ 73579663-73579686   |
| GGAGACCAGCTCTCTCCTGG | TGG | 0          | 5,18,19 | No   | chr4@ 30199658-30199681   |
| GGAGACCAGCTCTCTCCTGG | TGG | 0          | 5,18,19 | No   | chr4@ 151680874-151680897 |
| GGAGACCAGCTCTCTCCTGG | TGG | 0          | 5,18,19 | No   | chr4@ 108727823-108727846 |
| GGAGACCAGCTCTCTCCTGG | CAG | 0          | 5,18,19 | No   | chr4@ 62078377-62078400   |
| GGAGACCAGCTCTCTCCTGG | CAG | 0          | 5,18,19 | No   | chr4@ 62123282-62123305   |
| GGAGACCAGCTCTCTCCTGG | TGG | 0          | 5,18,19 | No   | chr4@ 83065235-83065258   |
| GGAGACCAGCTCTCTCCTGG | TGG | 0          | 5,18,19 | No   | chr3@ 159219907-159219930 |
| GGAGACCAGCTCTCTCCTGG | AGG | 0          | 5,18,19 | No   | chr3@ 4096360-4096383     |
| GGAGACCAGCTCTCTCCTGG | TGG | 0          | 5,18,19 | No   | chr3@ 124378684-124378707 |
| GGAGACCAGCTCTCTCCTGG | CAG | 0          | 5,18,19 | No   | chr3@ 26738833-26738856   |
| GGAGACCAGCTCTCTCCTGG | CAG | 0          | 5,18,19 | No   | chr3@ 34345807-34345830   |
| GGAGACCAGCTCTCTCCTGG | TGG | 0          | 5,18,19 | No   | chr3@ 32111198-32111221   |
| GGAGACCAGCTCTCTCCTGG | CAG | 0          | 5,18,19 | No   | chr3@ 114254410-114254433 |
| GGAGACCAGCTCTCTCCTGG | CAG | 0          | 5,18,19 | No   | chr3@ 113172052-113172075 |
| GGAGACCAGCTCTCTCCTGG | AAG | 0          | 5,18,19 | No   | chr3@ 57203611-57203634   |
| GGAGACCAGCTCTCTCCTGG | CAG | 0          | 5,18,19 | No   | chr3@ 69377100-69377123   |
| GGAGACCAGCTCTCTCCTGG | TGG | 0          | 5,18,19 | No   | chr3@ 5558766-5558789     |
| GGAGACCAGCTCTCTCCTGG | TAG | 0          | 5,18,19 | No   | chr3@ 11527095-11527118   |
| GGAGACCAGCTCTCTCCTGG | CGG | 0          | 5,18,19 | No   | chr3@ 46611273-46611296   |

| Sequence             | PAM | Similarity | Mism.   | Gene | Locus                     |
|----------------------|-----|------------|---------|------|---------------------------|
| GGAGACCAGCTCTCTCCCAG | TGG | 0          | 5,18,19 | No   | chr3@ 144908561-144908584 |
| GGAGACCAGCTCTCTCCCAG | CAG | 0          | 5,18,19 | No   | chr3@ 36306073-36306096   |
| GGAGACCAGCTCTCTCCTTG | TGG | 0          | 5,18,19 | No   | chr3@ 41652069-41652092   |
| GGAGACCAGCTCTCTCCTTG | GGG | 0          | 5,18,19 | No   | chr3@ 115173392-115173415 |
| GGAGACCAGCTCTCTCCTTG | CAG | 0          | 5,18,19 | No   | chr3@ 133700182-133700205 |
| GGAGACCAGCTCTCTCCTGG | TGG | 0          | 5,18,19 | No   | chr3@ 20346501-20346524   |
| GGAGACCAGCTCTCTCCTGG | CAG | 0          | 5,18,19 | No   | chr3@ 100015166-100015189 |
| GGAGACCAGCTCTCTCCTGG | TGG | 0          | 5,18,19 | No   | chr3@ 46919735-46919758   |
| GGAGACCAGCTCTCTCCTGG | TGG | 0          | 5,18,19 | No   | chr3@ 151512818-151512841 |
| GGAGACCAGCTCTCTCCTGG | AGG | 0          | 5,18,19 | No   | chr3@ 108746856-108746879 |
| GGAGACCAGCTCTCTCCTGG | TGG | 0          | 5,18,19 | No   | chr3@ 26868257-26868280   |
| GGAGACCAGCTCTCTCCTGG | TGG | 0          | 5,18,19 | No   | chr3@ 93119966-93119989   |
| GGAGACCAGCTCTCTCCTGG | TGG | 0          | 5,18,19 | No   | chr3@ 21381191-21381214   |
| GGAGACCAGCTCTCTCCTGG | TGG | 0          | 5,18,19 | No   | chr3@ 47072311-47072334   |
| GGAGACCAGCTCTCTCCCGG | CAG | 0          | 5,18,19 | No   | chr3@ 83121395-83121418   |
| GGAGACCAGCTCTCTCCTAG | TAG | 0          | 5,18,19 | No   | chr2@ 105869861-105869884 |
| GGAGACCAGCTCTCTCCTGG | AGG | 0          | 5,18,19 | No   | chr2@ 122903554-122903577 |
| GGAGACCAGCTCTCTCCTGG | CAG | 0          | 5,18,19 | No   | chr2@ 139063209-139063232 |
| GGAGACCAGCTCTCTCCTGG | TAG | 0          | 5,18,19 | No   | chr2@ 26689337-26689360   |
| GGAGACCAGCTCTCTCCCAG | CAG | 0          | 5,18,19 | No   | chr2@ 159197635-159197658 |
| GGAGACCAGCTCTCTCCCAG | TGG | 0          | 5,18,19 | No   | chr2@ 46195686-46195709   |
| GGAGCCCAGCTCTCTCCTGG | CAG | 0          | 5,18,19 | No   | chr2@ 17119860-17119883   |
| GGAGACCAGCTCTCTCCCAG | CGG | 0          | 5,18,19 | No   | chr2@ 159197142-159197165 |
| GGAGACCAGCTCTCTCCCAG | TGG | 0          | 5,18,19 | No   | chr2@ 60459507-60459530   |
| GGAGACCAGCTCTCTCCCAG | TGG | 0          | 5,18,19 | No   | chr2@ 35471154-35471177   |
| GGAGACCAGCTCTCTCCTGG | AGG | 0          | 5,18,19 | No   | chr2@ 172207843-172207866 |
| GGAGACCAGCTCTCTCCTGG | TGG | 0          | 5,18,19 | No   | chr2@ 83369849-83369872   |
| GGAGACCAGCTCTCTCCTGG | CAG | 0          | 5,18,19 | No   | chr2@ 49164550-49164573   |
| GGAGACCAGCTCTCTCCTGG | CGG | 0          | 5,18,19 | No   | chr2@ 150393519-150393542 |
| GGAGACCAGCTCTCTCCTGG | AGG | 0          | 5,18,19 | No   | chr2@ 17002933-17002956   |
| GGAGACCAGCTCTCTCCTGG | TGG | 0          | 5,18,19 | No   | chr2@ 54660679-54660702   |
| GGAGACCAGCTCTCTCCTGG | TGG | 0          | 5,18,19 | No   | chr2@ 17327529-17327552   |
| GGAGACCAGCTCTCTCCTGG | TAG | 0          | 5,18,19 | No   | chr2@ 126101331-126101354 |
| GGAGACCAGCTCTCTCCTGG | CAG | 0          | 5,18,19 | No   | chr2@ 5253245-5253268     |
| GGAGACCAGCTCTCTCCCAG | TGG | 0          | 5,18,19 | No   | chr1@ 127335569-127335592 |
| GGAGACCAGCTCTCTCCCGG | TGG | 0          | 5,18,19 | No   | chr1@ 4103047-4103070     |
| GGAGACCAGCTCTCTCCCGG | CAG | 0          | 5,18,19 | No   | chr1@ 88078854-88078877   |
| GGAGACCAGCTCTCTCCCTG | CAG | 0          | 5,18,19 | No   | chr1@ 17774490-17774513   |
| GGAGACCAGCTCTCTCCTAG | CAG | 0          | 5,18,19 | No   | chr1@ 106443078-106443101 |
| GGAGACCAGCTCTCTCCTGG | CAG | 0          | 5,18,19 | No   | chr1@ 76519730-76519753   |
| GGAGACCAGCTCTCTCCTGG | AGG | 0          | 5,18,19 | No   | chr1@ 172891985-172892008 |
| GGAGACCAGCTCTCTCCTGG | TGG | 0          | 5,18,19 | No   | chr1@ 78259010-78259033   |
| GGAGACCAGCTCTCTCCTGG | CAG | 0          | 5,18,19 | No   | chr1@ 34908583-34908606   |

| Sequence             | PAM | Similarity | Mism.    | Gene | Locus                      |
|----------------------|-----|------------|----------|------|----------------------------|
| GGAGACCAGCTCTCTCCTGG | AGG | 0          | 5,18,19  | No   | chr1@ 7533894-7533917      |
| GGAGACCAGCTCTCTCCTGG | TGG | 0          | 5,18,19  | No   | chr1@ 5630297-5630320      |
| GGAGACCAGCTCTCTCCTGG | CAG | 0          | 5,18,19  | No   | chr1@ 97487525-97487548    |
| GGAGACCAGCTCTCTCCTGG | TAG | 0          | 5,18,19  | No   | chr1@ 103930379-103930402  |
| GGAGACCAGCTCTCTCCTGG | TGG | 0          | 5,18,19  | No   | chr1@ 15757515-15757538    |
| GGAGACCAGCTCTCTCCTGG | AGG | 0          | 5,18,19  | No   | chr1@ 100157950-100157973  |
| GGAGACCAGCTCTCTCCTGG | CAG | 0          | 5,18,19  | No   | chr1@ 108158262-108158285  |
| GGAGACCAGCTCTCTCCTGG | CAG | 0          | 5,18,19  | No   | chr1@ 47353386-47353409    |
| GGAGACCAGCTCTCTCCTGG | TGG | 0          | 5,18,19  | No   | chr1@ 55552544-55552567    |
| GGAGACCAGCTCTCTCCTGG | TGG | 0          | 5,18,19  | No   | chr1@ 16756203-16756226    |
| GGAGACCAGCTCTCTCCTGG | CAG | 0          | 5,18,19  | No   | chr1@ 54208112-54208135    |
| GGAGACCAGCTCTCTCCTGG | AGG | 0          | 5,18,19  | No   | chr1@ 16860570-16860593    |
| GGAGACCAGCTCTCTCCCTG | TGG | 0          | 5,18,19  | No   | chr1@ 47231303-47231326    |
| GGAGACCAGCTCTCTCCAG  | TAG | 0          | 5,18,19  | No   | chr1@ 77571061-77571084    |
| GGAGACCAGCTCTCTCCAG  | TGG | 0          | 5,18,19  | No   | chr1@ 10823266-10823289    |
| GGAGACCAGCTCTCTCCAG  | TGG | 0          | 5,18,19  | No   | chr1@ 176157669-176157692  |
| GGAGACCAGCTCTCTCCTTG | TGG | 0          | 5,18,19  | No   | chr1@ 15862176-15862199    |
| GGAGACCAGCTCTCTCCTAG | TGG | 0          | 5,18,19  | No   | chr1@ 31428081-31428104    |
| GGAGACCAGCTCTCTCCTAG | AGG | 0          | 5,18,19  | No   | chr1@ 5675370-5675393      |
| GGAGACCAGCTCTCTCCTAG | TGG | 0          | 5,18,19  | No   | chr1@ 5549675-5549698      |
| GGAGACCAGCTCTCTCCTGG | TGG | 0          | 5,18,19  | No   | chr1@ 44244715-44244738    |
| GGAGACCAGCTCTCTCCTGG | CAG | 0          | 5,18,19  | No   | chr1@ 54631810-54631833    |
| GGAGACCAGCTCTCTCCTGG | CAG | 0          | 5,18,19  | No   | chr1@ 4233464-4233487      |
| GGAGACCAGCTCTCTCCTGG | TAG | 0          | 5,18,19  | No   | chr1@ 26258462-26258485    |
| GGAGGCCAGATCTCTACACT | GAG | 0          | 10,16,20 | No   | chr9@ 32416081-32416104    |
| GGAGGCCAGACTCTCTATG  | TGG | 0          | 11,17,19 | No   | chr6@ 53643668-53643691    |
| GGAGGCTAGCTCTCTCCTCT | GAG | 0          | 7,18,20  | No   | chrX@ 70666396-70666419    |
| GGAGGCTAGCTCTCTCCTCT | GAG | 0          | 7,18,20  | No   | chrX@ 132792325-132792348  |
| GGAGGCTAGCTCTCTCCTCT | GAG | 0          | 7,18,20  | No   | chrX@ 91197687-91197710    |
| GGAGGCTAGCTCTCTCCTCT | GAG | 0          | 7,18,20  | No   | chr18@ 59496434-59496457   |
| GGAGGCTAGCTCTCTCCTCT | GAG | 0          | 7,18,20  | No   | chr17@ 77301479-77301502   |
| GGAGGCTAGCTCTCTCCTCT | GAG | 0          | 7,18,20  | No   | chr16@ 61101473-61101496   |
| GGAGGCTAGCTCTCTCCTCT | GAG | 0          | 7,18,20  | No   | chr14@ 98241800-98241823   |
| GGAGGCTAGCTCTCTCCTCT | GAG | 0          | 7,18,20  | No   | chr14@ 97338402-97338425   |
| GGAGGCTAGCTCTCTCCTCT | GAG | 0          | 7,18,20  | No   | chr14@ 89331000-89331023   |
| GGAGGCTAGCTCTCTCCTCT | GAG | 0          | 7,18,20  | No   | chr13@ 106663917-106663940 |
| GGAGGCTAGCTCTCTCCTCT | GAG | 0          | 7,18,20  | No   | chr13@ 29237155-29237178   |
| GGAGGCTAGCTCTCTCCTCT | GAG | 0          | 7,18,20  | No   | chr10@ 70890076-70890099   |
| GGAGGCTAGCTCTCTCCTCT | GAG | 0          | 7,18,20  | No   | chr10@ 33314070-33314093   |
| GGAGGCTAGCTCTCTCCTCT | GAG | 0          | 7,18,20  | No   | chr6@ 109098957-109098980  |
| GGAGGCTAGCTCTCTCCTCT | GAG | 0          | 7,18,20  | No   | chr6@ 72036337-72036360    |
| GGAGGCTAGCTCTCTCCTCT | GAG | 0          | 7,18,20  | No   | chr6@ 132422192-132422215  |
| GGAGGCTAGCTCTCTCCTCT | GAG | 0          | 7,18,20  | No   | chr3@ 70052308-70052331    |

| Sequence             | PAM | Similarity | Mism.    | Gene | Locus                     |
|----------------------|-----|------------|----------|------|---------------------------|
| GGAGGCTAGCTCTCTCTCT  | GAG | 0          | 7,18,20  | No   | chr3@ 7483195-7483218     |
| GGAGGCTAGCTCTCTCTCT  | GAG | 0          | 7,18,20  | No   | chr3@ 47377717-47377740   |
| GGAGGCAAGCTCTCTCTCT  | GAG | 0          | 7,18,20  | No   | chr2@ 139439394-139439417 |
| GGAGGCTAGCTCTCTCTCT  | GAG | 0          | 7,18,20  | No   | chr2@ 63641606-63641629   |
| GGAGGCTAGCTCTCTCTCT  | GAG | 0          | 7,18,20  | No   | chr2@ 138845504-138845527 |
| GGAGACCAGCTCTCTTCAGG | TGG | 0          | 5,16,19  | No   | chr19@ 29757054-29757077  |
| GGAGACCAGCTCTCTTCAGG | TGG | 0          | 5,16,19  | No   | chr18@ 5906535-5906558    |
| GGAGACCAGCTCTCTTCAGG | CAG | 0          | 5,16,19  | No   | chr18@ 8255187-8255210    |
| GGAGACCAGCTCTCTTCAGG | AGG | 0          | 5,16,19  | No   | chr16@ 59858894-59858917  |
| GGAGACCAGCTCTCTGCAGG | TGG | 0          | 5,16,19  | No   | chr3@ 61572672-61572695   |
| GCAGGCCAGCTCTGTCCATG | GGG | 0          | 2,14,19  | No   | chr2@ 128085118-128085141 |
| GGAGGCCAGTCTCTCCTTG  | CAG | 0          | 10,18,19 | No   | chr11@ 57834333-57834356  |
| GGAGGCCAGTCTCTCCTGG  | CAG | 0          | 10,18,19 | No   | chr9@ 73701854-73701877   |
| GGAGGCCAGTCTCTCCTGG  | CAG | 0          | 10,18,19 | No   | chr5@ 23194590-23194613   |
| GGAGCCCAGCTCTTCCATG  | AGG | 0          | 5,14,19  | No   | chrX@ 81606549-81606572   |
| GGAGACCAGCTCTTCCAGG  | CAG | 0          | 5,14,19  | No   | chr10@ 27837442-27837465  |
| GGAGACCAGCTCTGTCCAGG | CAG | 0          | 5,14,19  | No   | chr10@ 90662942-90662965  |
| GGAGACCAGCTCTGTCCAGG | TGG | 0          | 5,14,19  | No   | chr10@ 47380065-47380088  |
| GGAGACCAGCTCTTCCAGG  | TGG | 0          | 5,14,19  | No   | chr9@ 14434569-14434592   |
| GGAGACCAGCTCTTCCAAG  | TGG | 0          | 5,14,19  | No   | chr3@ 99890769-99890792   |
| GGAGACCAGCTCTTCCAGG  | AGG | 0          | 5,14,19  | No   | chr2@ 37096430-37096453   |
| GGAGGTCAGCTCTCTTCACT | GAG | 0          | 6,16,20  | No   | chr11@ 84396647-84396670  |
| GGAGGGCAGCTCTCTCTGCG | CAG | 0          | 6,17,18  | No   | chr8@ 119006123-119006146 |
| GGAGGCCATCTCTTCCACC  | TGG | 0          | 9,16,20  | No   | chr16@ 28834580-28834603  |
| GGAGGCGAGCTCTCTCCTAG | CGG | 0          | 7,18,19  | No   | chrX@ 85281240-85281263   |
| GGAGGCAAGCTCTCTCCTGG | CAG | 0          | 7,18,19  | No   | chrX@ 96785875-96785898   |
| GGAGGCAAGCTCTCTCCTGG | CAG | 0          | 7,18,19  | No   | chrX@ 95806571-95806594   |
| GGAGGCTAGCTCTCTCCTGG | TGG | 0          | 7,18,19  | No   | chr17@ 82983562-82983585  |
| GGAGGCTAGCTCTCTCCCTG | CAG | 0          | 7,18,19  | No   | chr14@ 46861414-46861437  |
| GGAGGCTAGCTCTCTCCTGG | CGG | 0          | 7,18,19  | No   | chr11@ 41847667-41847690  |
| GGAGGTCAGCTCTCTCCTGG | CAG | 0          | 6,18,19  | No   | chr16@ 23695473-23695496  |
| GGAGGTCAGCTCTCTCCTGG | AGG | 0          | 6,18,19  | No   | chr10@ 37122749-37122772  |
| GGAGGACAGCTCTCTCCTTG | AGG | 0          | 6,18,19  | No   | chr6@ 64089717-64089740   |
| GGAGGTCAGCTCTCTCCTGG | CAG | 0          | 6,18,19  | No   | chr4@ 37518990-37519013   |
| GGAGGCAAGCTCTCTTCAGG | GAG | 0          | 7,16,19  | No   | chr13@ 82221819-82221842  |
| GGAGGCCATCTCTCTCCTGG | CAG | 0          | 9,18,19  | No   | chrX@ 117033005-117033028 |
| GGAGGCCAACTCTCTCCCGG | TAG | 0          | 9,18,19  | No   | chr1@ 10415719-10415742   |
| GGAGGCCGGCTCTGGCCACG | TGG | 0          | 8,14,15  | No   | chr14@ 51282439-51282462  |
| GGAGACCAGCTCTTCCCG   | TGG | 0          | 5,16,18  | No   | chr13@ 92069186-92069209  |
| GGAGGCAAGCTCTGTCCAGG | CAG | 0          | 7,14,19  | No   | chr7@ 107995743-107995766 |
| GGAGGCTAGCTCTTCCAGG  | CAG | 0          | 7,14,19  | No   | chr3@ 10504161-10504184   |
| GGAGACCAGCTCTTCCCTCG | TGG | 0          | 5,14,18  | No   | chr17@ 93275166-93275189  |
| GGAGGCCAGCTATCTCCTGG | CAG | 0          | 12,18,19 | No   | chr19@ 9322638-9322661    |

## Tnfsf11-sg2

|                      |     |      |          |            |
|----------------------|-----|------|----------|------------|
| Sequence             | PAM | Exon | Activity | Off-target |
| GCCATCTCTCCCACGTCCCG | GGG | 1    | 58       | 92         |

### Guide Details

|            |                                   |
|------------|-----------------------------------|
| Cut site   | chr14 [+78,308,026 : -78,308,026] |
| GC %       | 70                                |
| Activity   | 58                                |
| Off-target | 92                                |

### OFF-TARGET ANALYSIS:

| Mismatches | 0 | 1 | 2 | 3  | Total |
|------------|---|---|---|----|-------|
| Coding     | 0 | 0 | 0 | 3  | 3     |
| Non-Coding | 0 | 0 | 1 | 27 | 28    |

### OFF-TARGET HITS:

| Sequence              | PAM | Similarity | Mism.   | Gene | Locus                      |
|-----------------------|-----|------------|---------|------|----------------------------|
| GCCCTCTCCCCACGTCCCG   | CAG | 1          | 4,9,20  | Yes  | chr7@ 4836174-4836197      |
| GCCAGCTCTGCCAGGTCCCG  | AAG | 0          | 5,10,14 | Yes  | chr11@ 102064626-102064649 |
| GCCAGCTCTCCCACCTCCAG  | CAG | 0          | 5,15,19 | Yes  | chr6@ 125031822-125031845  |
| CCCATCTCGCCACGTCCCG   | GGG | 1          | 1,9,20  | No   | chr6@ 118335281-118335304  |
| ACCATCTCTCCCACGTCCAT  | CAG | 0          | 1,19,20 | No   | chr15@ 103328649-103328672 |
| GCCTTTTCTCCCACTTCCCG  | CAG | 0          | 4,6,15  | No   | chr17@ 34030421-34030444   |
| CCCATCTCTCCCACATCCCA  | CAG | 0          | 1,15,20 | No   | chr1@ 48043227-48043250    |
| GCCAGCTCTCCCACGTGCTG  | CAG | 0          | 5,17,19 | No   | chrX@ 137165367-137165390  |
| GCCAACTCTCCCACCTCCCA  | AAG | 0          | 5,15,20 | No   | chr9@ 57331002-57331025    |
| GCCAGCTCTCCCACTTCCCT  | TAG | 0          | 5,15,20 | No   | chr8@ 113518567-113518590  |
| GCCAGCTCTCCCACCTGCCG  | CAG | 0          | 5,15,17 | No   | chr5@ 49788664-49788687    |
| GCCATACCTCCCACTTCCCG  | TGG | 0          | 6,7,15  | No   | chr5@ 84540224-84540247    |
| GCCATCTCTCCCACCTCACG  | GGG | 0          | 15,18   | No   | chr1@ 133548365-133548388  |
| GGCATCTCTCCCACTTCCCTG | GAG | 0          | 2,15,19 | No   | chr8@ 13430493-13430516    |
| GCCACCTCTCCCACCTCCAG  | TGG | 0          | 5,15,19 | No   | chr12@ 30124249-30124272   |
| GCGATCTCACCAAGTCCCG   | GGG | 0          | 3,9,14  | No   | chrX@ 105289388-105289411  |
| GCCATCCCTCCCACCTCCCT  | AGG | 0          | 7,15,20 | No   | chr1@ 76141909-76141932    |
| GCCAGCTCTCCCACGGCCCT  | GGG | 0          | 5,16,20 | No   | chr4@ 63137888-63137911    |

| Sequence             | PAM | Similarity | Mism.    | Gene | Locus                     |
|----------------------|-----|------------|----------|------|---------------------------|
| GCCAGCTCTCCAAGTCCCA  | CAG | 0          | 5,14,20  | No   | chr11@ 99272497-99272520  |
| GCCAGCTCTCCAGGTCCCT  | CAG | 0          | 5,14,20  | No   | chr10@ 41008104-41008127  |
| GCCAACTCTCCAGGTCCCC  | TAG | 0          | 5,14,20  | No   | chr9@ 73125106-73125129   |
| GCCATCTCTCAAACCTCCCG | AAG | 0          | 11,12,15 | No   | chr8@ 88393082-88393105   |
| GCCATCTCTCCAACGTCCAT | GGG | 0          | 12,19,20 | No   | chr6@ 34778065-34778088   |
| GCCATCACTCCCACCTCCTG | CAG | 0          | 7,15,19  | No   | chr7@ 49255346-49255369   |
| GTCATCTCTCCAACCTCCCG | CAG | 0          | 2,14,15  | No   | chr18@ 67741223-67741246  |
| GCCATCTCTCCAACCTCCTG | TAG | 0          | 12,15,19 | No   | chr2@ 116194052-116194075 |
| GCCATCTCTCCCACCTTCCC | AAG | 0          | 15,17,20 | No   | chr1@ 69109072-69109095   |
| GCCATCTCTCTCACGCCCTG | CAG | 0          | 11,16,19 | No   | chr19@ 6825810-6825833    |
| GCCATCTCTCCAACGCCCGG | TAG | 0          | 12,16,19 | No   | chr12@ 83018950-83018973  |

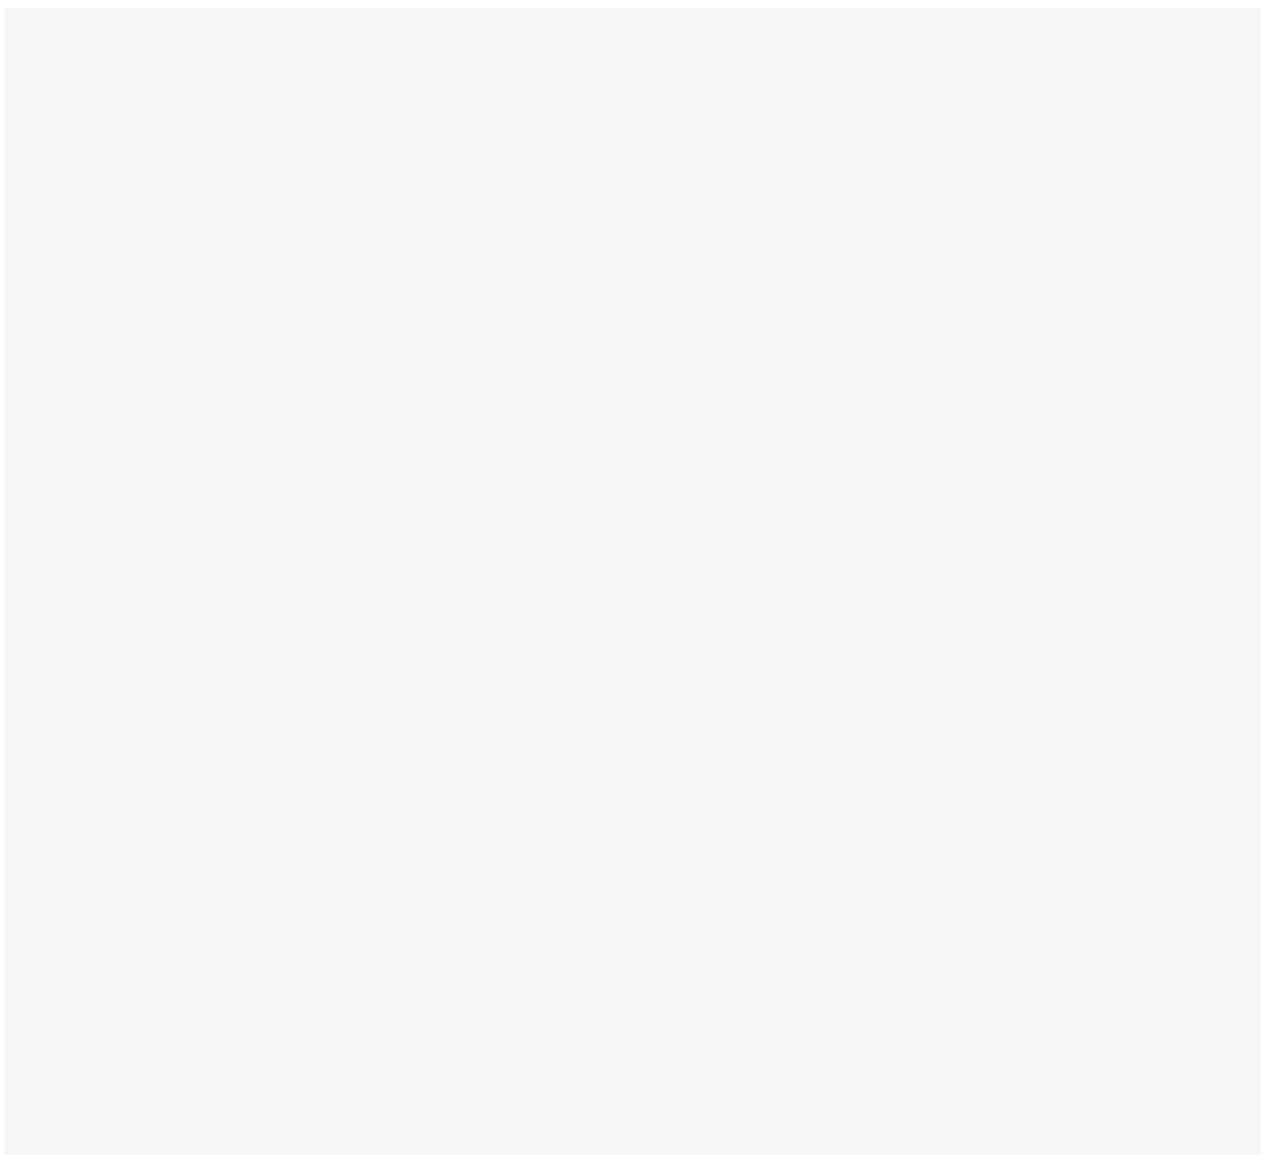

## Tnfsf11-sg3

|                      |     |      |          |            |
|----------------------|-----|------|----------|------------|
| Sequence             | PAM | Exon | Activity | Off-target |
| GAGCCAATCAGCCTCCAGGA | GGG | P    | 67       | 77         |

### Guide Details

|            |                                   |
|------------|-----------------------------------|
| Cut site   | chr14 [+78,308,116 : -78,308,116] |
| GC %       | 60                                |
| Activity   | 67                                |
| Off-target | 77                                |

### OFF-TARGET ANALYSIS:

| Mismatches | 0 | 1 | 2 | 3  | Total |
|------------|---|---|---|----|-------|
| Coding     | 0 | 0 | 0 | 0  | 0     |
| Non-Coding | 0 | 0 | 1 | 32 | 33    |

### OFF-TARGET HITS:

| Sequence              | PAM | Similarity | Mism.   | Gene | Locus                     |
|-----------------------|-----|------------|---------|------|---------------------------|
| CAGCCAATCAGCGTCCAGGA  | CAG | 4          | 1,13    | No   | chr7@ 52576531-52576554   |
| TTGCCAAACAGCCTCCAGGA  | AGG | 3          | 1,2,8   | No   | chr13@ 78227477-78227500  |
| GACCAAAGCAGCCTCCAGGA  | AGG | 2          | 3,5,8   | No   | chr4@ 11676087-11676110   |
| GAAGGAATCAGCCTCCAGGA  | CAG | 2          | 3,4,5   | No   | chr11@ 77740518-77740541  |
| GCTCCCATCAGCCTCCAGGA  | CAG | 1          | 2,3,6   | No   | chr4@ 124624488-124624511 |
| GAGAAAATCAACCTCCAGGA  | AAG | 1          | 4,5,11  | No   | chr3@ 92534116-92534139   |
| CAGCCAAACAGACTCCAGGA  | GAG | 1          | 1,8,12  | No   | chr6@ 131455389-131455412 |
| AAGCCAAGCAGCTTCCAGGA  | AAG | 1          | 1,8,13  | No   | chr15@ 54942196-54942219  |
| GAGCCAAACCGTCTCCAGGA  | AGG | 1          | 8,10,12 | No   | chr17@ 69224111-69224134  |
| GTGACAATCAGCCTCCAGCA  | AAG | 1          | 2,4,19  | No   | chr7@ 139751433-139751456 |
| GAGACAAGCAGCATCCAGGA  | GAG | 1          | 4,8,13  | No   | chr6@ 81756928-81756951   |
| TAGCCCCTCAGCCTCCAGGA  | AAG | 1          | 1,6,7   | No   | chr18@ 21894445-21894468  |
| GAGACATTCAGCCTCCTGGA  | TAG | 1          | 4,7,17  | No   | chr2@ 66836841-66836864   |
| GATCCAAGCAGCCTTCCAGGA | GAG | 1          | 3,8,15  | No   | chr6@ 125518531-125518554 |
| GAGACAAACAGCCTGCAGGA  | AGG | 1          | 4,8,15  | No   | chr17@ 32080924-32080947  |
| GAGCCCACCAGGCTCCAGGA  | AGG | 1          | 6,8,12  | No   | chr9@ 114553929-114553952 |
| GAACCCATCAGCCTCCAGCA  | CGG | 1          | 3,6,19  | No   | chr7@ 46246433-46246456   |
| GAGCCCCTGAGCCTCCAGGA  | AGG | 1          | 6,7,9   | No   | chr5@ 105560828-105560851 |
| GACCCACTCAGCCTACAGGA  | GGG | 1          | 3,7,15  | No   | chr6@ 34281356-34281379   |
| GTGCCAATCAGGCTCCAGCA  | AGG | 1          | 2,12,19 | No   | chr14@ 24760455-24760478  |



| Sequence              | PAM | Similarity | Mism.    | Gene | Locus                     |
|-----------------------|-----|------------|----------|------|---------------------------|
| GAGATAATCAGCCTCAAGGA  | AGG | 1          | 4,5,16   | No   | chr6@ 65926362-65926385   |
| GAGCAAAGCAGCCTCAAGGA  | TGG | 0          | 5,8,16   | No   | chrX@ 71141650-71141673   |
| GAGCCAATCTGTCTCCTGGA  | AGG | 0          | 10,12,17 | No   | chr2@ 150736290-150736313 |
| AAGCCAATCAGCTTCCAGCA  | TGG | 0          | 1,13,19  | No   | chr7@ 123844813-123844836 |
| GACCCAAGCAGCCCCAGGA   | TGG | 0          | 3,8,14   | No   | chr5@ 130150526-130150549 |
| GAGCTAATCACCCCTTCAGGA | CAG | 0          | 5,11,15  | No   | chr5@ 29898425-29898448   |
| GAGCAACTCAGCCCCAGGA   | TGG | 0          | 5,7,14   | No   | chr4@ 120869839-120869862 |
| GAGCCAGTCAGCCTCCAGTT  | GGG | 0          | 7,19,20  | No   | chr9@ 34683131-34683154   |
| GAGCCAATCAAGCTCCTGGA  | AGG | 0          | 11,12,17 | No   | chr17@ 44547438-44547461  |
| GAGCCAAGCAGCCTGCAGCA  | GAG | 0          | 8,15,19  | No   | chr5@ 130466815-130466838 |
| CAGCCAATCAGCTACCAGGA  | AGG | 0          | 1,13,14  | No   | chrX@ 129911572-129911595 |
| GAGCCAATCAGCATGCAGAA  | GGG | 0          | 13,15,19 | No   | chr17@ 7782714-7782737    |
